## **Effects of underlying morbidities on the occurrence of deaths in COVID-19 patients: A systematic review and meta-analysis**

**Authors:** Md. Mostaufed Ali Khan, MSc<sup>1</sup>□, Md. Nuruzzaman Khan, MSc<sup>2\*</sup>□, Md. Golam Mustagir, MSc<sup>1</sup>, Juwel Rana, MPH<sup>3</sup>, Md. Saiful Islam, MPH<sup>4</sup>, and Md. Iqbal Kabir, PhD<sup>4</sup>

### **Affiliations:**

<sup>1</sup>Department of Population Science and Human Resource Development, University of Rajshahi, Rajshahi-6205, Bangladesh.

<sup>2</sup>Department of Population Sciences, Jatiya Kabi Kazi Nazrul Islam University, Trishal, Mymensingh-2220, Bangladesh.

<sup>3</sup>Department of Public Health, North South University, Bashundhara, Dhaka-1229, Bangladesh.

<sup>4</sup>Planning, Monitoring and Research Directorate General of Health Services (DGHS), Mohakhali, Dhaka 1212, Bangladesh.

### **\*Corresponding Author:**

Md. Nuruzzaman Khan, MSc  
Lecturer  
Department of Population Sciences,  
Jatiya Kabi Kazi Nazrul Islam University,  
Trishal, Mymensingh-2220, Bangladesh.  
e-mail: [sumonrupop@gmail.com](mailto:sumonrupop@gmail.com)

□ Joint 1<sup>st</sup> author. These authors contributed equally to this study.

## **Effects of underlying morbidities on the occurrence of deaths in COVID-19 patients: A systematic review and meta-analysis**

### **Abstract**

**Background:** Coronavirus disease 2019 (COVID-19), the most hectic pandemic of the era, is increasing exponentially and taking thousands of lives worldwide. This study aimed to assess the prevalence of pre-existing morbidities among COVID-19 infected patients and their mortality risks against each type of pre-existing morbidity category.

**Methods:** To conduct this systematic review and meta-analysis, Medline, Web of Science, Scopus, and CINAHL databases were searched using specified relevant keywords. Further searches were conducted using the reference list of the selected studies, renowned pre-print servers (e.g., medRxiv, bioRxiv, SSRN), and relevant journal websites. Studies written in the English language included if those were conducted among COVID-19 patients with and without comorbidities and presented survivor vs. non-survivor counts or hazard/odds of deaths or survivors against types of pre-existing morbidities. Comorbidities reported in the selected studies were grouped into eight categories. The pooled likelihoods of deaths in each category were estimated using a fixed or random-effect model, based on the heterogeneity assessment. Publication bias was assessed by visual inspection of the funnel plot asymmetry and Egger's regression test. Trim and Fill method was used if there any publication bias was found.

**Results:** A total of 42 studies included in this study comprised of 39,398 samples. The most common pre-existing morbidities in COVID-19 infected patients were hypertension (36.5%), cardiovascular disease (11.9%), and diabetes (22.0%). The higher likelihood of deaths was found among COVID-19 patients who had pre-existing cardiovascular diseases (OR: 3.32, 95% CI: 2.79-3.95), immune and metabolic disorders (OR: 2.39, 95% CI: 2.00-2.85), respiratory diseases (OR: 2.02, 95% CI: 1.80-2.26), cerebrovascular diseases (OR: 4.12, 95%

CI: 3.04-5.58), any types of cancers (OR: 2.22, 95% CI: 1.63-3.03), renal (OR: 3.02, 95% CI: 2.60-3.52), and liver diseases (OR: 1.44, 95% CI: 1.21-1.71).

**Conclusions:** This study provides evidence of a higher likelihood of deaths among COVID-19 patients against morbidity categories. These findings could potentially help healthcare providers to sort out the most endangered COVID-19 patients by comorbidities, take precautionary measures during hospitalization, assess susceptibility to death, and prioritize their treatment, which could potentially reduce the number of fatalities in COVID-19.

**Keywords:** Coronavirus; 2019-nCoV; COVID-19; SARS-CoV-2; Comorbidity; Mortality

## Introduction

The coronavirus disease 2019 (COVID-19) caused by the SARS-CoV-2, a virus from the large coronavirus family, started in a seafood market in Wuhan, China, and is now a global pandemic. The virus is highly transmissible (reproductive number: 1.6-6.5, doubling time: 6.4 to 7.4 days) [1], which can mainly transmit through respiratory droplets (coughs or sneezes), close contact with the infected person [2, 3], and touching surfaces or objects that are touched by the infected person [2, 3]. As of May 08, 2020, 130 days since the virus was first detected on December 31, 2019, approximately 3.77 million people from 215 countries or territories have been infected with this virus [4]. Around 0.26 million of them have already died [4], and about 2% of currently infected people are now in critical conditions [5]. To date, there is no specific medicine or vaccine for COVID-19; therefore, the majority of the affected countries are taking non-pharmaceutical interventions such as restriction in inhabitants' mobility, quarantine of suspected persons, isolation of infected persons, travel restrictions, and airport screening to reduce further infections [1, 6, 7].

The virus is equally transmissible in all ages; however, people who are now in critical conditions or who died were more likely to be in older age and found they had one or more morbidities [8-11]. Commonly reported morbidities among patients who died from COVID-19 were hypertension, diabetes, cardiovascular disease, and cerebrovascular disease [8, 12-14]. Notably, these comorbidities are independent causes of millions of annual deaths globally; 17.9 million deaths from cardiovascular system diseases, 9 million deaths from cancers, 3.9 million deaths from respiratory diseases, and 1.6 million deaths from diabetes, according to a report by World Health Organization (WHO) in 2018 [15]. People with one or more of these morbidities usually have poor immune systems, which increases their susceptibility to being infected, to reach in critical condition, and even died from a secondary disease like COVID-19 [1, 12, 16-19]. Precautionary measures following COVID-19 among

patients with one or more morbidities could be potential ways to combat its adverse outcomes and severities. Thus, we need to identify possible morbidities that are potentially increasing the risks of mortality, which are still lacking. Studies conducted among COVID-19 patients are highly varied with reported morbidities and the likelihood of mortality [8, 10, 20, 21]. To address these gaps, this study was conducted with two primary aims: (i) to summarize pre-existing morbidities in patients with COVID-19, a secondary disease, and (ii) to estimate the likelihood of mortality from COVID-19 against each category of pre-existing morbidities. The study findings could help healthcare providers to take appropriate measures to control fatalities from this pandemic.

## **Methods**

This systematic review and meta-analysis was conducted by following the Preferred Reporting for Systematic Review and Meta-Analysis (PRISMA) consensus statement [22]. Studies relevant to the COVID-19 disease among people with pre-existing one or more morbidities were included.

### ***Search strategy***

Four databases: Medline, Web of Science, Scopus, and CINAHL were searched, concluded on May 01, 2020, using pre-specified search strategies for each database. The search strategy consists of keywords on COVID-19 disease (COVID-19, 2019-nCoV, Coronavirus, SARS-CoV-2), pre-existing morbidity (comorbidity, morbidity), and patients' survival status (mortality, death, died) combined using the Boolean operators (AND, OR). Details of the search strategies are presented in the supplementary tables (Table 1- 4). Additional searches were conducted using the reference list of the selected studies, relevant journal websites, and renowned pre-print servers (medRxiv, bioRxiv, SSRN).

### ***Study selection criteria***

All peer-reviewed and pre-print (not-peer-reviewed) studies met the pre-specified inclusion, and exclusion criteria were included in this study.

### ***Inclusion criteria***

Studies met the following inclusion criteria were included if: (i) conducted for the patients infected with COVID-19 with or without pre-existing morbidities, (ii) presented survivor and non-survivor counts following COVID-19 among patients with or without preexisting morbidity or presented hazard/risk/odds ratio of deaths or survival following COVID-19 against the types of morbidities, and (iii) published in the English language. Studies without complete information but met our inclusion criteria were included in the narrative review.

### ***Exclusion criteria***

Studies excluded if COVID-19 was reported among pregnant women or children (aged <18 years) and written in languages other than English. We also excluded review papers, correspondence, viewpoints, editorials, commentaries, and studies where no information related to the previous morbidity was reported.

### ***Data extraction and quality assessment***

A data extraction form was designed, trialed, and modified to extract information from the selected studies. Two authors (MMAK and MGM) used the pre-designed form to extract information independently. The following information was extracted: study location, design, sample size, study population characteristics (e.g., age, gender), and survivor vs. non-survivor counts among COVID-19 patients with or without specific morbidity. If available, the odds/risk/hazard ratio of deaths among COVID-19 patients with comorbidities were extracted against the types of morbidity. Disagreements reported in data extraction were reviewed and

solved by the corresponding and senior authors (MNK and MIK). The modified Newcastle-Ottawa scale, as part of the data extraction strategy, was used to assess the quality of selected studies.

### *Statistical analysis*

Pre-existing one or more morbidities among COVID-19 patients reported in the selected studies were grouped into eight broad categories based on the type of morbidities. These were cardiovascular system diseases (hypertension, cardiovascular disease, arrhythmia, heart failure), immune and metabolic disorders (diabetes, immunosuppression, autoimmune disease, immunodeficiency, metabolic disorder), respiratory system diseases (chronic lung diseases, Chronic Obstructive Pulmonary Disease (COPD), acute respiratory distress syndrome, tuberculosis, etc.), cancer (malignancy, cancer, and tumor), cerebrovascular diseases (cerebrovascular disease, peripheral vascular disease), renal system diseases (chronic kidney disease, urinary disease), liver system diseases (chronic liver disease, cirrhosis, hyperlipidemia, Hepatitis B, etc.), and gastrointestinal system diseases (chronic digestive disorder, gastrointestinal disease). The odds ratios (ORs) of deaths with 95% confidence interval (95% CI) for the people exposed to a particular category of morbidity as compared to people unexposed to any specific morbidity was estimated from the extracted raw data or reported ORs. We first used the Haldane correction (add constant 0.5 to each cell) for the studies in which the sample included in the exposed or unexposed group was zero (such as all exposed patients died or vice versa) [23-25]. We then used either a fixed effect or random effect model to estimate ORs, selected based on heterogeneity assessment. When the test of heterogeneity ( $I^2$  statistics) was moderate (50-74%) or high ( $\geq 75\%$ ), the pooled estimates of ORs were computed using the random-effects model [26]. Subgroup and meta-regression analyses were conducted for the groups where moderate or higher heterogeneity was reported. For this, pre-specified subgroups (types of morbidities, study country, study design,

mean age of the total sample, mean age of death sample) were used. Publication bias was assessed by visual inspection of the funnel plot asymmetry and Egger's regression test [27]. When evidence of publication bias was found, the Trim and Fill method was used to estimate and adjust potentially missing studies, and the effect size was recalculated accordingly [28]. Stata software version 15.1 (StataCorp. LP, College Station, TX, USA) was used for all analyses.

## **Results**

A total of 247 articles were identified from the databases searched, and the additional 15 articles were identified by checking the reference list of the selected articles and the selected journal's websites (Figure 1). Around 1273 articles were also initially identified from the aforementioned pre-prints servers. Of the selected articles, 1341 articles were excluded after screening titles and abstracts, leaving 114 articles for full-text review for possible inclusion in this study. Of these, 55 articles were excluded based on the inclusion and exclusion criteria for the study sample (e.g., excluded pregnant or children), and 11 articles were excluded for study types (e.g., review papers, correspondence, viewpoints, editorials, commentaries), and six articles were excluded for entirely incomplete data. A total of 42 articles were finally selected for this study; 36 articles were included in the meta-analysis, and the remaining six articles were synthesized narratively.

### ***Study characteristics***

A summary of the 42 selected articles is represented in Table 1. A total of 23 of the selected 42 articles were published in peer-reviewed journals, and 18 articles were published in pre-print servers. One of the selected studies was a national report for Australia. The majority of these studies were retrospective in nature (26), along with seven prospective studies. The selected studies comprised 36,398 COVID-19 patients, 7,558 (42.5%) of them had preexisting



one or more morbidities, 38.4% of patients had undergone critical care, and 5,310 (14.6%) of them died. Their average age was  $60.5 \pm 8.0$  years, and 60.1% of them were male. The mean age at death was  $69.9 \pm 5.6$  for the patients who died in COVID-19. A total of 36 selected studies presented death counts following COVID-19 among patients with or without specific one or more morbidities. Four included studies (Du et al. [29], Zhang et al. [30], Kim et al. [31], and Yao et al. [32]) were conducted only for dead COVID-19 patients and reported the status of pre-existing morbidities before their deaths. All studies were of moderate to high quality (Supplementary Table 6-7).

### ***Prevalence of pre-existing morbidity among COVID-19 patients***

Distribution of the type of morbidity presented in Table 2. Approximately 36.5% of the total COVID-19 patients reported that they had hypertension, 22.0% had diabetes, 11.9% had cardiovascular disease, 4.1% had chronic lung disease, 2.3% had COPD, 11.0% had hyperlipidemia, and 3.0% had chronic kidney disease.

### ***Effects of preexisting morbidity on deaths in COVID-19 patients***

The pooled ORs of deaths for each category of pre-existing morbidities among COVID-19 patients, publication bias, and Trim and Fill estimates are presented in Table 3. COVID-19 patients with preexisting cardiovascular system disease were 3.32 times more likely to die (OR: 3.32, 95% CI: 2.79-3.95;  $I^2 = 83.8\%$ ) than the patients who had no cardiovascular system diseases. The odds of death among COVID-19 patients with immune and metabolic disorders were also found to be 239% higher (OR: 2.39, 95% CI: 2.00-2.85;  $I^2 = 64.5\%$ ) than among COVID-19 patients without such disorders. The incidence of COVID-19 among people with respiratory system disease increases mortality risk around two times (OR: 2.02, 95% CI: 1.80-2.26;  $I^2 = 71.2\%$ ) than COVID-19 patients without respiratory system diseases. Similarly, we found higher mortality risk among COVID-19 patients who had pre-existing

any types of cancers (OR: 2.22, 95% CI: 1.63-3.03,  $I^2 = 67.7\%$ ) and cerebrovascular system diseases (OR: 4.12, 95% CI: 3.04-5.58) than their counterparts. Moreover, the incidence of COVID-19 among patients with pre-existing renal system disease and chronic liver disease increased mortality risk by about three times (OR: 3.02, 95% CI: 2.60-3.51) and one and half times (OR: 1.44, 95% CI: 1.21-1.71), respectively compared to the COVID-19 patients who did not mention such comorbidities.

We found evidence of publication bias for the three categories of pre-existing morbidities: any type of cancer, cerebrovascular diseases, and liver system diseases (Figure 1a to 8a). We then used Trim and Fill methods to impute the number of missing studies, which hypothetically imputed two studies for cardiovascular system diseases, three studies for renal system diseases, and three studies for liver system diseases. The pooled analysis, including these missing studies, showed almost similar results to the summary estimates presented earlier without these missing studies.

Evidence of higher deaths among COVID-19 patients with preexisting one or more morbidities were also demonstrated in the narrative review (Supplementary Table 5). In two of the three articles reviewed in this study, researchers reported that each of the patients who died following COVID-19 had pre-existing morbidities, mostly had any types of cardiovascular diseases and immune and metabolic disorders [29, 30]. Researchers in one study found around 38% of the COVID-19 patients with hypertension died [33], and one study reported higher odds for deaths in kidney injury [34].

### ***Stratified analysis***

We found evidence of high heterogeneity ( $I^2 > 75\%$ ) for cardiovascular system diseases (83.8%). To examine the sources of heterogeneity, we conducted stratified analysis across types of comorbidities, study design (cross-sectional vs. retrospective cohort vs. prospective

cohort), sample size (divided based on mean sample size of the included studies and classified as  $\leq 1134$ ,  $> 1134$ ), age of the total sample (divided based on mean age and classified as  $\leq 60$  years and  $> 60$  years), and age at death (divided based on mean age and classified as  $\leq 69$  vs.  $> 69$ ) (Table 4). We found odds of death varied across specific types of pre-existing morbidities included to generate the cardiovascular system diseases category. For instance, in the cardiovascular system diseases category, the odds of mortality were found higher for COVID-19 patients with pre-existing heart failure (OR: 3.98, 95% CI: 2.96-5.35), cardiovascular disease (OR: 3.35, 95% CI: 2.53-4.42), hypertension (OR: 3.28, 95% CI: 2.53-4.24), than for COVID-19 patients with pre-existing arrhythmia (OR: 3.00, 95% CI: 1.96-4.57).

## **Discussion**

This study aimed to summarize pre-existing morbidities among COVID-19 patients, which increases their incidence of deaths and their corresponding likelihoods. A total of 42 studies were included that comprised 36,398 samples, and 7,558 (42.5%) of them had pre-existing morbidities. The most frequently reported morbidities were hypertension (36.5%), diabetes (22.0%), and cardiovascular disease (11.9%). The likelihood of death was higher among COVID-19 patients who had comorbidities like cardiovascular and cerebrovascular diseases, respiratory diseases, renal diseases, immune and metabolic disorders, hepatic diseases, and cancer. This evidence will guide physicians to take precautionary measures, which could reduce the number of fatalities following secondary infection with COVID-19.

Among the total positive COVID-19 cases included in this systematic review, around 43% had pre-existing one or more morbidities, mostly cardiovascular diseases and immune and metabolic disorders. Importantly, patients with these diseases are more likely to have a higher neutrophil-lymphocyte ratio [35, 36], higher D-dimer level [37], and higher C-reactive

protein [38]. These increased parameters lead to multiple organ failure [39, 40], severe pneumonia, hypoxia, respiratory failure, myocardial damage, and circulatory failure [18]. These non-communicable diseases independently elevate the risk of death and increase further if patients are infected with COVID-19 [21, 40-42]. COVID-19 also damages patients' myocardial cells by destabilizing coronary plaque in pre-existing cardiovascular conditions and previous history of myocardial infarct [43, 44]. Similar higher risks of mortality were reported among SARS-CoV and MERS-CoV patients with cardiovascular diseases [41, 43, 45, 46]. These two diseases are considered as ancestors of current COVID-19, which were reported in 2003 and 2012, respectively [41, 43, 45, 46]. Evidence also validates that the occurrence of influenza, along with cardiovascular diseases and diabetes, could increase the risk of death [47, 48].

Pooled likelihoods in this study provide evidence of higher deaths among COVID-19 patients who had pre-existing chronic respiratory diseases or any type of cancers. Chronic respiratory diseases like COPD and asthma are well-established risk factors for pneumonia [49], which also increase the susceptibility to COVID-19 infection [50]. Once patients are infected with COVID-19, these further affect the patient's respiratory system and progress to severe hypoxemia [51]; therefore, the cumulative effects lead to events of death [18, 50]. Cancer patients are more likely to report a systemic immunosuppressive state and progress to severe clinical events, such as require intensive care (ICU) or death [52, 53]. Secondary infection of COVID-19 has its own adverse consequences on the human body, which could, therefore, increase severe clinical events as well as deaths among patients with these pre-existing morbidities.

This study also suggests that patients with cerebrovascular, liver, and renal diseases are more vulnerable to mortality following the second incidence of COVID-19 than the patient does not have such diseases. The results are comparable to deaths among previously reported

SARS patients [54]. Comorbidities such as, cardio-cerebrovascular diseases, liver damage, or renal diseases accelerate an abrupt loss of kidney function [55, 56], tissue damage that causes hypoxia, shock, and rhabdomyolysis [34, 57], and increased occurrence of thrombocytopenia (reduced platelet counts) [21, 58]. These could independently elevate the risk of death and add to the adverse effects on the human body being infected with COVID-19. Together, these increase occurrences of deaths. Moreover, elevated alanine aminotransferase (ALT) levels and reduced albumin levels are found to be associated with higher mortality in COVID-19 [21, 58], which can be caused by chronic liver and kidney diseases [58-62]. Thus, it indicates an urgency of early precautions to reduce and prevent deaths among COVID-19 patients with pre-existing morbidities.

### ***Strengths and limitations***

This study has several strengths and limitations that should be reported. To our knowledge, this is the first of its kind that summarizes all morbidities among COVID-19 patients that lead to death. Moreover, morbidities reported among COVID-19 patients were classified into board groups based on their characteristics, and the likelihood of death was estimated separately for each group. This evidence informs healthcare providers about the risk of death among COVID-19 patients with different groups of pre-existing morbidities. Thus, they will be able to take precautionary measures early targeting to prevent deaths. However, this study reported the odds of death for COVID-19 patients with one pre-existing morbidity only. Many COVID-19 patients may have multi-morbidities (COVID-19 with pre-existing two or more morbidities) and a higher risk of death. However, the studies included in this review considered each morbidity separately; for instance, if COVID-19 patients had both hypertension and diabetes, they were included in both groups. None of the included studies considered COVID-19 with two or more morbidities together; therefore, we failed to provide the likelihood of deaths for COVID-19 patients with two or more pre-existing morbidities.

Moreover, the likelihoods presented in this study were mostly unadjusted (31 of the 36 articles included) calculated from the extracted raw data. This may overestimate or underestimate the actual likelihood of deaths in COVID-19 patients because age and other socio-demographic characteristics are potential confounders of their deaths, which should be adjusted for getting unbiased estimates. Despite these limitations, this study is unique and beneficial for healthcare providers to handle COVID-19 patients with pre-existing morbidities.

## **Conclusion**

About 46% of the sample included in this systematic review had one or more pre-existing morbidities and got COVID-19 as a secondary infection. The most common pre-existing morbidities were hypertension, diabetes, and cardiovascular disease. The likelihood of death was higher among COVID-19 patients who had pre-existing cardiovascular and cerebrovascular diseases, respiratory diseases, renal diseases, immune and metabolic disorders, liver diseases, and any types of cancer. These findings will help healthcare providers to sort COVID-19 patients by comorbidities, take precautionary measures during hospitalization, assess susceptibility to death, and prioritize their treatment. These could potentially reduce the number of fatalities from secondary infection with COVID-19 disease.

**Acknowledgements:** The authors are grateful to the authors of the paper included in this review.

**Ethical Approval:** Not applicable

**Funding:** No funds was received for this study.

## **Authors Contribution**

Conceptualization: MMAK, NMK, MIK

Research design: MMAK, MNK and MIK

Data curation: MMAK and MGM

Analysis: MNK and MMAK

Draft preparation: MMAK, MNK, and MGM

Supervision: MNK and MIK

Critical review: MNK, JR, MIK and MSI

## References

1. Park M, Cook AR, Lim JT, Sun Y, and Dickens BL, A Systematic Review of COVID-19 Epidemiology Based on Current Evidence. *J Clin Med*, 2020. **9**(4). doi: 10.3390/jcm9040967.
2. CDC. *Coronavirus Disease 2019 (COVID-19)*. 2020 [cited 2020 20.03.2020]; Available from: <https://www.cdc.gov/coronavirus/2019-ncov/prepare/transmission.html>.
3. Chan JF, Yuan S, Kok KH, To KK, Chu H, Yang J, et al., A familial cluster of pneumonia associated with the 2019 novel coronavirus indicating person-to-person transmission: a study of a family cluster. *Lancet*, 2020. **395**(10223): p. 514-523. doi: 10.1016/s0140-6736(20)30154-9.
4. WHO. *Novel Coronavirus (COVID-19) Situation*. 2020 08.05.2020; Available from: <https://experience.arcgis.com/experience/685d0ace521648f8a5beeeee1b9125cd>.
5. Worldmeter. *COVID-19 Coronavirus Pandemic (Real time database)*. 2020 08.05.2020]; Available from: <https://www.worldometers.info/coronavirus/>.
6. Organization WH, *Non-pharmaceutical public health measures for mitigating the risk and impact of epidemic and pandemic influenza: annex: report of systematic literature reviews*. 2019, World Health Organization.
7. Cowling BJ, Ali ST, Ng TW, Tsang TK, Li JC, Fong MW, et al., Impact assessment of non-pharmaceutical interventions against coronavirus disease 2019 and influenza in Hong Kong: an observational study. *Lancet Public Health*, 2020.
8. Guan WJ, Liang WH, Zhao Y, Liang HR, Chen ZS, Li YM, et al., Comorbidity and its impact on 1590 patients with Covid-19 in China: A Nationwide Analysis. *European Respiratory Journal*, 2020. **26**: p. 26. doi: <https://dx.doi.org/10.1183/13993003.00547-2020>.
9. Mehra MR, Desai SS, Kuy S, Henry TD, and Patel AN, Cardiovascular Disease, Drug Therapy, and Mortality in Covid-19. *New England Journal of Medicine*, 2020. doi: 10.1056/NEJMoa2007621.
10. Yang X, Yu Y, Xu J, Shu H, Xia J, Liu H, et al., Clinical course and outcomes of critically ill patients with SARS-CoV-2 pneumonia in Wuhan, China: a single-centered, retrospective, observational study. *The Lancet Respiratory Medicine*, 2020. **24**: p. 24. doi: [https://dx.doi.org/10.1016/S2213-2600\(20\)30079-5](https://dx.doi.org/10.1016/S2213-2600(20)30079-5).



11. Zhang J, Wang X, Jia X, Li J, Hu K, Chen G, et al., Risk factors for disease severity, unimprovement, and mortality in COVID-19 patients in Wuhan, China. *Clinical Microbiology and Infection*, 2020. doi: 10.1016/j.cmi.2020.04.012.
12. Siordia JA, Epidemiology and clinical features of COVID-19: A review of current literature. *Journal of Clinical Virology*, 2020. **127**: p. 104357. doi: <https://doi.org/10.1016/j.jcv.2020.104357>.
13. Huang C, Wang Y, Li X, Ren L, Zhao J, Hu Y, et al., Clinical features of patients infected with 2019 novel coronavirus in Wuhan, China. *The Lancet*, 2020. **395**(10223): p. 497-506.
14. Yang J, Zheng Y, Gou X, Pu K, Chen Z, Guo Q, et al., Prevalence of comorbidities in the novel Wuhan coronavirus (COVID-19) infection: a systematic review and meta-analysis. *International Journal of Infectious Diseases*, 2020.
15. WHO, *Noncommunicable diseases*. 2018, World Health Organization, Geneva, Switzerland: World Health Organization, Geneva, Switzerland.
16. Madjid M, Safavi-Naeini P, Solomon SD, and Vardeny O, Potential Effects of Coronaviruses on the Cardiovascular System: A Review. *JAMA Cardiology*, 2020. doi: 10.1001/jamacardio.2020.1286.
17. Henry B and Lippi G, Chronic kidney disease is associated with severe coronavirus disease 2019 (COVID-19) infection. *International Urology and Nephrology*, 2020. doi: 10.1007/s11255-020-02451-9.
18. Ruan Q, Yang K, Wang W, Jiang L, and Song J, Clinical predictors of mortality due to COVID-19 based on an analysis of data of 150 patients from Wuhan, China. *Intensive Care Medicine*, 2020. doi: 10.1007/s00134-020-05991-x.
19. Yang J, Zheng Y, Gou X, Pu K, Chen Z, Guo Q, et al., Prevalence of comorbidities in the novel Wuhan coronavirus (COVID-19) infection: a systematic review and meta-analysis. *International Journal of Infectious Diseases*. doi: 10.1016/j.ijid.2020.03.017.
20. Chen T, Dai Z, Mo P, Li X, Ma Z, Song S, et al., Clinical characteristics and outcomes of older patients with coronavirus disease 2019 (COVID-19) in Wuhan, China (2019): a single-centered, retrospective study. *Journals of Gerontology Series A Biological Sciences & Medical Sciences*, 2020. **11**: p. 11. doi: <https://dx.doi.org/10.1093/gerona/glaa089>.
21. Zhou F, Yu T, Du R, Fan G, Liu Y, Liu Z, et al., Clinical course and risk factors for mortality of adult inpatients with COVID-19 in Wuhan, China: a retrospective cohort

- study. *Lancet*, 2020. **395**(10229): p. 1054-1062. doi: [https://dx.doi.org/10.1016/S0140-6736\(20\)30566-3](https://dx.doi.org/10.1016/S0140-6736(20)30566-3).
22. Moher D, Liberati A, Tetzlaff J, and Altman DG, Preferred reporting items for systematic reviews and meta-analyses: the PRISMA statement. *PLoS Med*, 2009. **6**(7): p. e1000097. doi: 10.1371/journal.pmed.1000097.
  23. Valenzuela C, 2 solutions for estimating odds ratios with zeros. *Revista medica de Chile*, 1993. **121**(12): p. 1441-1444.
  24. Liu D, Liu RY, and Xie M, Exact meta-analysis approach for discrete data and its application to  $2 \times 2$  tables with rare events. *Journal of the American Statistical Association*, 2014. **109**(508): p. 1450-1465. doi: 10.1080/01621459.2014.946318.
  25. Papastergiou P, Mouchtouri V, Pinaka O, Katsiaflaka A, Rachiotis G, and Hadjichristodoulou C, Elevated bathing-associated disease risks despite certified water quality: a cohort study. *International journal of environmental research and public health*, 2012. **9**(5): p. 1548-1565. doi: 10.3390/ijerph9051548.
  26. Higgins JPT, Thompson SG, Deeks JJ, and Altman DG, Measuring inconsistency in meta-analyses. *BMJ*, 2003. **327**(7414): p. 557. doi: 10.1136/bmj.327.7414.557.
  27. Egger M, Smith GD, Schneider M, and Minder C, Bias in meta-analysis detected by a simple, graphical test. *Bmj*, 1997. **315**(7109): p. 629-634.
  28. Duval S and Tweedie R, Trim and fill: a simple funnel plot-based method of testing and adjusting for publication bias in meta-analysis. *Biometrics*, 2000. **56**(2): p. 455-463.
  29. Du RH, Liu LM, Yin W, Wang W, Guan LL, Yuan ML, et al., Hospitalization and Critical Care of 109 Decedents with COVID-19 Pneumonia in Wuhan, China. *Annals of the American Thoracic Society*, 2020. **07**: p. 07. doi: <https://dx.doi.org/10.1513/AnnalsATS.202003-225OC>.
  30. Zhang B, Zhou X, Qiu Y, Feng F, Feng J, Jia Y, et al., Clinical characteristics of 82 death cases with COVID-19. *medRxiv*, 2020: p. 2020.02.26.20028191. doi: <https://dx.doi.org/10.1101/2020.02.26.20028191>.
  31. Kim T, Park O, Yoo H, Ahn S, Jo J, Kim JW, et al., Epidemiological and Clinical Characteristics of Early 101 Deceased Patients in the Coronavirus Disease-19 (COVID-19) Outbreak in Republic of Korea. *SSRN*, 2020. doi: <https://ssrn.com/abstract=3571538>.

32. Yao T, Gao Y, Cui Q, Shen J, Peng B, Chen Y, et al., Clinical Characteristics of 55 Cases of Deaths with COVID-19 Pneumonia in Wuhan, China: Retrospective Case Series. *SSRN*, 2020. doi: <http://dx.doi.org/10.2139/ssrn.3550019>
33. Grasselli G, Zangrillo A, Zanella A, Antonelli M, Cabrini L, Castelli A, et al., Baseline Characteristics and Outcomes of 1591 Patients Infected With SARS-CoV-2 Admitted to ICUs of the Lombardy Region, Italy. *JAMA*, 2020: p. 06. doi: <https://dx.doi.org/10.1001/jama.2020.5394>.
34. Cheng Y, Luo R, Wang K, Zhang M, Wang Z, Dong L, et al., Kidney disease is associated with in-hospital death of patients with COVID-19. *Kidney International*, 2020. **20**: p. 20. doi: <https://dx.doi.org/10.1016/j.kint.2020.03.005>.
35. Angkananard T, Anothaisintawee T, McEvoy M, Attia J, and Thakkinstian A, Neutrophil Lymphocyte Ratio and Cardiovascular Disease Risk: A Systematic Review and Meta-Analysis. *BioMed research international*, 2018. **2018**: p. 2703518-2703518. doi: 10.1155/2018/2703518.
36. Mertoglu C and Gunay M, Neutrophil-Lymphocyte ratio and Platelet-Lymphocyte ratio as useful predictive markers of prediabetes and diabetes mellitus. *Diabetes & Metabolic Syndrome: Clinical Research & Reviews*, 2017. **11**: p. S127-S131. doi: <https://doi.org/10.1016/j.dsx.2016.12.021>.
37. Nwose EU, Richards RS, Jelinek HF, and Kerr PG, D-dimer identifies stages in the progression of diabetes mellitus from family history of diabetes to cardiovascular complications. *Pathology*, 2007. **39**(2): p. 252-7. doi: 10.1080/00313020701230658.
38. Bisioendial RJ, Boekholdt SM, Vergeer M, Stroes ESG, and Kastelein JJP, C-reactive protein is a mediator of cardiovascular disease. *European Heart Journal*, 2010. **31**(17): p. 2087-2091. doi: 10.1093/eurheartj/ehq238.
39. Wang D, Hu B, Hu C, Zhu F, Liu X, Zhang J, et al., Clinical characteristics of 138 hospitalized patients with 2019 novel coronavirus–infected pneumonia in Wuhan, China. *JAMA*, 2020. **323**(11): p. 1061-1069.
40. Chen N, Zhou M, Dong X, Qu J, Gong F, Han Y, et al., Epidemiological and clinical characteristics of 99 cases of 2019 novel coronavirus pneumonia in Wuhan, China: a descriptive study. *The Lancet*, 2020. **395**(10223): p. 507-513. doi: 10.1016/S0140-6736(20)30211-7.
41. Shi S, Qin M, Shen B, Cai Y, Liu T, Yang F, et al., Association of Cardiac Injury With Mortality in Hospitalized Patients With COVID-19 in Wuhan, China. *JAMA Cardiology*, 2020. doi: 10.1001/jamacardio.2020.0950 %J JAMA Cardiology.

42. Liu Y, Du X, Chen J, Jin Y, Peng L, Wang HHX, et al., Neutrophil-to-lymphocyte ratio as an independent risk factor for mortality in hospitalized patients with COVID-19. *Journal of Infection*. doi: 10.1016/j.jinf.2020.04.002.
43. Guo T, Fan Y, Chen M, Wu X, Zhang L, He T, et al., Cardiovascular Implications of Fatal Outcomes of Patients With Coronavirus Disease 2019 (COVID-19). *JAMA Cardiology*, 2020. doi: 10.1001/jamacardio.2020.1017 %J JAMA Cardiology.
44. Clerkin Kevin J, Fried Justin A, Raikhelkar J, Sayer G, Griffin Jan M, Masoumi A, et al., Coronavirus Disease 2019 (COVID-19) and Cardiovascular Disease. *Circulation*, 2020. **0**(0). doi: 10.1161/CIRCULATIONAHA.120.046941.
45. Alhogbani T, Acute myocarditis associated with novel Middle east respiratory syndrome coronavirus. *Ann Saudi Med*, 2016. **36**(1): p. 78-80. doi: 10.5144/0256-4947.2016.78.
46. Oudit GY, Kassiri Z, Jiang C, Liu PP, Poutanen SM, Penninger JM, et al., SARS-coronavirus modulation of myocardial ACE2 expression and inflammation in patients with SARS. 2009. **39**(7): p. 618-625. doi: 10.1111/j.1365-2362.2009.02153.x.
47. Kenny Helena C and Abel ED, Heart Failure in Type 2 Diabetes Mellitus. *Circulation Research*, 2019. **124**(1): p. 121-141. doi: 10.1161/CIRCRESAHA.118.311371.
48. Dei Cas A, Khan SS, Butler J, Mentz RJ, Bonow RO, Avogaro A, et al., Impact of diabetes on epidemiology, treatment, and outcomes of patients with heart failure. 2015. **3**(2): p. 136-145.
49. Restrepo MI, Mortensen EM, Pugh JA, and Anzueto AJERJ, COPD is associated with increased mortality in patients with community-acquired pneumonia. 2006. **28**(2): p. 346-351.
50. Halpin DMG, Faner R, Sibila O, Badia JR, and Agusti A, Do chronic respiratory diseases or their treatment affect the risk of SARS-CoV-2 infection? *The Lancet Respiratory Medicine*, 2020. doi: 10.1016/S2213-2600(20)30167-3.
51. Lippi G and Henry BM, Chronic obstructive pulmonary disease is associated with severe coronavirus disease 2019 (COVID-19). *Respiratory Medicine*, 2020. doi: 10.1016/j.rmed.2020.105941.
52. Liang W, Guan W, Chen R, Wang W, Li J, Xu K, et al., Cancer patients in SARS-CoV-2 infection: a nationwide analysis in China. *The Lancet Oncology*, 2020. **21**(3): p. 335-337. doi: 10.1016/S1470-2045(20)30096-6.

53. Hanna TP, Evans GA, and Booth CM, Cancer, COVID-19 and the precautionary principle: prioritizing treatment during a global pandemic. *Nature Reviews Clinical Oncology*, 2020. **17**(5): p. 268-270. doi: 10.1038/s41571-020-0362-6.
54. Tsang KW, Ho PL, Ooi GC, Yee WK, Wang T, Chan-Yeung M, et al., A cluster of cases of severe acute respiratory syndrome in Hong Kong. 2003. **348**(20): p. 1977-1985.
55. Vanmassenhove J, Kielstein J, Jörres A, and Van Biesen WJTL, Management of patients at risk of acute kidney injury. 2017. **389**(10084): p. 2139-2151.
56. Lau WL, Huisa BN, and Fisher M, The Cerebrovascular-Chronic Kidney Disease Connection: Perspectives and Mechanisms. *Translational stroke research*, 2017. **8**(1): p. 67-76. doi: 10.1007/s12975-016-0499-x.
57. Tisoncik JR, Korth MJ, Simmons CP, Farrar J, Martin TR, and Katze MG, Into the eye of the cytokine storm. *Microbiology and molecular biology reviews : MMBR*, 2012. **76**(1): p. 16-32. doi: 10.1128/MMBR.05015-11.
58. Boettler T, Newsome PN, Mondelli MU, Maticic M, Cordero E, Cornberg M, et al., Care of patients with liver disease during the COVID-19 pandemic: EASL-ESCMID position paper. *JHEP Reports*, 2020. **2**(3): p. 100113. doi: <https://doi.org/10.1016/j.jhepr.2020.100113>.
59. Afdhal N, McHutchison J, Brown R, Jacobson I, Manns M, Poordad F, et al., Thrombocytopenia associated with chronic liver disease. *J Hepatol*, 2008. **48**(6): p. 1000-7. doi: 10.1016/j.jhep.2008.03.009.
60. Dorgalaleh A, Mahmudi M, Tabibian S, Khatib ZK, Tamaddon GH, Moghaddam ES, et al., Anemia and thrombocytopenia in acute and chronic renal failure. *International journal of hematology-oncology and stem cell research*, 2013. **7**(4): p. 34-39.
61. Lang J, Katz R, Ix JH, Gutierrez OM, Peralta CA, Parikh CR, et al., Association of serum albumin levels with kidney function decline and incident chronic kidney disease in elders. *Nephrology Dialysis Transplantation*, 2017. **33**(6): p. 986-992. doi: 10.1093/ndt/gfx229.
62. Oh RC, Hustead TR, Ali SM, and Pantsari MW, Mildly Elevated Liver Transaminase Levels: Causes and Evaluation. *Am Fam Physician*, 2017. **96**(11): p. 709-715.
63. Cao J, Tu WJ, Cheng W, Yu L, Liu YK, Hu X, et al., Clinical Features and Short-term Outcomes of 102 Patients with Corona Virus Disease 2019 in Wuhan, China. *Clinical Infectious Diseases*, 2020. **02**: p. 02. doi: <https://dx.doi.org/10.1093/cid/ciaa243>.

64. Chen T, Wu D, Chen H, Yan W, Yang D, Chen G, et al., Clinical characteristics of 113 deceased patients with coronavirus disease 2019: retrospective study. *BMJ*, 2020. **368**: p. m1091. doi: <https://dx.doi.org/10.1136/bmj.m1091>.
65. Deng Y, Liu W, Liu K, Fang YY, Shang J, Zhou L, et al., Clinical characteristics of fatal and recovered cases of coronavirus disease 2019 (COVID-19) in Wuhan, China: a retrospective study. *Chinese Medical Journal*, 2020. **20**: p. 20. doi: <https://dx.doi.org/10.1097/CM9.0000000000000824>.
66. Wu C, Chen X, Cai Y, Xia J, Zhou X, Xu S, et al., Risk Factors Associated With Acute Respiratory Distress Syndrome and Death in Patients With Coronavirus Disease 2019 Pneumonia in Wuhan, China. *JAMA Internal Medicine*, 2020. **13**: p. 13. doi: <https://dx.doi.org/10.1001/jamainternmed.2020.0994>.
67. Yuan M, Yin W, Tao Z, Tan W, and Hu Y, Association of radiologic findings with mortality of patients infected with 2019 novel coronavirus in Wuhan, China. *PLoS ONE [Electronic Resource]*, 2020. **15**(3): p. e0230548. doi: <https://dx.doi.org/10.1371/journal.pone.0230548>.
68. Chen X, Jiang Q, Ma Z, Ling J, Hu W, Cao Q, et al., Clinical Characteristics of Hospitalized Patients with SARS-CoV-2 and Hepatitis B virus Co-infection. *medRxiv*, 2020: p. 2020.03.23.20040733. doi: 10.1101/2020.03.23.20040733.
69. Caramelo F, Ferreira N, and Oliveiros B, Estimation of risk factors for COVID-19 mortality - preliminary results. *medRxiv*, 2020: p. 2020.02.24.20027268. doi: 10.1101/2020.02.24.20027268.
70. Ren LL, Wang YM, Wu ZQ, Xiang ZC, Guo L, Xu T, et al., Identification of a novel coronavirus causing severe pneumonia in human: a descriptive study. *Chin Med J (Engl)*, 2020. doi: 10.1097/cm9.0000000000000722.
71. Govt. A, COVID-19, Australia: Epidemiology Report 12: Reporting week *Communicable diseases intelligence*, 2020. **44**.
72. Du R-H, Liang L-R, Yang C-Q, Wang W, Cao T-Z, Li M, et al., Predictors of Mortality for Patients with COVID-19 Pneumonia Caused by SARS-CoV-2: A Prospective Cohort Study. *European Respiratory Journal*, 2020: p. 2000524. doi: 10.1183/13993003.00524-2020
73. Wang L, He W, Yu X, Hu D, Bao M, Liu H, et al., Coronavirus disease 2019 in elderly patients: Characteristics and prognostic factors based on 4-week follow-up. *Journal of Infection*, 2020. doi: 10.1016/j.jinf.2020.03.019.

74. Fu L, Fei J, Xiang H-X, Xiang Y, Tan Z-X, Li M-D, et al., Influence factors of death risk among COVID-19 patients in Wuhan, China: a hospital-based case-cohort study. *medRxiv*, 2020: p. 2020.03.13.20035329. doi: 10.1101/2020.03.13.20035329
75. Paranjpe I, Russak A, De Freitas JK, Lala A, Miotto R, Vaid A, et al., Clinical Characteristics of Hospitalized Covid-19 Patients in New York City. *medRxiv*, 2020: p. 2020.04.19.20062117. doi: 10.1101/2020.04.19.20062117.
76. Cummings MJ, Baldwin MR, Abrams D, Jacobson SD, Meyer BJ, Balough EM, et al., Epidemiology, clinical course, and outcomes of critically ill adults with COVID-19 in New York City: a prospective cohort study. *medRxiv*, 2020. doi: 10.1101/2020.04.15.20067157
77. Guo T-M, Tong Y, Chen J, Huang L, Cheng B, and Zhou J, Clinical Features Predicting Mortality Risk in Older Patients with COVID-19. *SSRN*, 2020. doi: <http://dx.doi.org/10.2139/ssrn.3569846>.
78. Zhu Q, Zhao S, Lai X, Zhao J, Guo D, Gan L, et al., Dose-Response Association between Risk Factors and Incidence of COVID-19 in 325 Hospitalized Patients: A Multicenter Retrospective Cohort Study. *SSRN*, 2020. doi: <http://dx.doi.org/10.2139/ssrn.3562478>
79. Yin Y, Zhou S, Zhang X, Li Z, Liu X, Jiang C, et al., Critically Ill Patients with COVID-19 in China: A Multicenter Retrospective Observational Study. *SSRN*, 2020. doi: <http://dx.doi.org/10.2139/ssrn.3562469>
80. Sun X, Wang J, Liu Z, Zhou X, Yan X-w, Li T, et al., Characteristics of Patients with COVID-19 Pneumonia Admitted to the Intensive Care Unit and Predictors of Mortality in Wuhan, China: A Single-Centered Retrospective Cohort Study. *SSRN*, 2020. doi: <http://dx.doi.org/10.2139/ssrn.3559629>
81. Luo XM, Zhou W, Xia H, Yang W, Yan X, Wang B, et al., Characteristics of SARS-CoV-2 Infected Patients with Clinical Outcome During Epidemic Ongoing Outbreak in Wuhan, China. *SSRN*, 2020. doi: <http://dx.doi.org/10.2139/ssrn.3552812>
82. Zhang S, Guo M, Duan L, Wu F, Wang Z, Xu J, et al., Short Term Outcomes and Risk Factors for Mortality in Patients with COVID-19 in Wuhan, China: A Retrospective Study. *SSRN*, 2020. doi: <http://dx.doi.org/10.2139/ssrn.3551390>.
83. Solís P and Carreño H, COVID-19 Fatality and Comorbidity Risk Factors among Confirmed Patients in Mexico. *medRxiv*, 2020: p. 2020.04.21.20074591. doi: 10.1101/2020.04.21.20074591

84. Yao Q, Wang P, Wang X, Qie G, Meng M, Tong X, et al., Retrospective study of risk factors for severe SARS-Cov-2 infections in hospitalized adult patients. *Pol Arch Intern Med*, 2020. doi: 10.20452/pamw.15312.
85. Zangrillo A, Beretta L, Scandroglio AM, Monti G, Fominskiy E, Colombo S, et al., Characteristics, treatment, outcomes and cause of death of invasively ventilated patients with COVID-19 ARDS in Milan, Italy. *Crit Care Resusc*, 2020.
86. Yan Y, Yang Y, Wang F, Ren H, Zhang S, Shi X, et al., Clinical characteristics and outcomes of patients with severe covid-19 with diabetes. *BMJ Open Diabetes Research & Care*, 2020. **8**(1): p. e001343. doi: 10.1136/bmjdr-2020-001343.
87. Tedeschi S, Giannella M, Bartoletti M, Trapani F, Tadolini M, Borghi C, et al., Clinical impact of renin-angiotensin system inhibitors on in-hospital mortality of patients with hypertension hospitalized for COVID-19. *Clinical Infectious Diseases*, 2020. doi: 10.1093/cid/ciaa492.
88. Nikpouraghdam M, Jalali Farahani A, Alishiri G, Heydari S, Ebrahimnia M, Samadinia H, et al., Epidemiological characteristics of coronavirus disease 2019 (COVID-19) patients in IRAN: A single center study. *Journal of Clinical Virology*, 2020. **127**: p. 104378. doi: <https://doi.org/10.1016/j.jcv.2020.104378>.
89. Benelli G, Buscarini E, Canetta C, La Piana G, Merli G, Scartabellati A, et al., SARS-COV-2 comorbidity network and outcome in hospitalized patients in Crema, Italy. *medRxiv*, 2020: p. 2020.04.14.20053090. doi: 10.1101/2020.04.14.20053090.
90. Levy TJ, Richardson S, Coppa K, Barnaby DP, McGinn T, Becker LB, et al., Estimating Survival of Hospitalized COVID-19 Patients from Admission Information. *medRxiv*, 2020: p. 2020.04.22.20075416. doi: 10.1101/2020.04.22.20075416.
91. Sneep R, Cattle F, Brookes A, Jina R, Williams S, Galloway J, et al., Early Epidemiological and Clinical Analysis of the First 200 Patients with COVID-19 Admitted via the Emergency Department in Kings College Hospital, London: A Retrospective Cohort Study. *SSRN*, 2020. doi: <https://ssrn.com/abstract=3576791>.



**Table 1.** Background characteristics of the selected studies and hospitalized sample (n = 36,398).

| SI                                           | Authors                            | Article type  | Study country | Publication date | Study type    | Total Sample (n) | Total death Sample, n (%) | Mean age (± SD, or confidence interval) | Mean age at death (± SD, or confidence interval) | Male sample (%) | Female sample (%) | Prevalence of any forms of pre-existing morbidities among COVID-19 disease patients <sup>a</sup> , n (%) | ICU admission following COVID-19 disease <sup>b</sup> (%) |
|----------------------------------------------|------------------------------------|---------------|---------------|------------------|---------------|------------------|---------------------------|-----------------------------------------|--------------------------------------------------|-----------------|-------------------|----------------------------------------------------------------------------------------------------------|-----------------------------------------------------------|
| <i>Studies included in the meta-analysis</i> |                                    |               |               |                  |               |                  |                           |                                         |                                                  |                 |                   |                                                                                                          |                                                           |
| 1.                                           | Guan et al. [8]                    | Peer reviewed | China         | 26 Mar 2020      | Retrospective | 1590             | 50 (3.1)                  | 48.9 ± 16.3                             | -                                                | 57.3            | 42.7              | 399 (25.1)                                                                                               | 6.2                                                       |
| 2.                                           | Cao et al. [63]                    | Peer reviewed | China         | 2 Apr 2020       | Prospective   | 102              | 17 (16.7)                 | 54 (37-67)                              | 72 (63-81)                                       | 52.0            | 48.0              | 47 (46.1)                                                                                                | 17.6                                                      |
| 3.                                           | Chen et al. [64]                   | Peer reviewed | China         | 31 Mar 2020      | Retrospective | 274              | 113 (41.2)                | 62 (44-70)                              | 68 (62-77)                                       | 62.0            | 38.0              | 133 (48.5)                                                                                               | -                                                         |
| 4.                                           | Deng et al. [65]                   | Peer reviewed | China         | 20 Mar 2020      | Retrospective | 225              | 109 (48.4)                | 54                                      | 69 (62-74)                                       | 55.1            | 44.9              | 127 (56.4)                                                                                               | -                                                         |
| 5.                                           | Yang et al. [10]                   | Peer reviewed | China         | 24 Feb 2020      | Retrospective | 52               | 32 (61.5)                 | 59.7±13.3                               | 64.6 ± 11.2                                      | 67.0            | 33.0              | 21 (40.4)                                                                                                | 38.5                                                      |
| 6.                                           | Wu et al. [66]                     | Peer reviewed | China         | 13 Mar 2020      | Retrospective | 201              | 44 (21.9)                 | 51 (43-60)                              | -                                                | 63.7            | 36.3              | -                                                                                                        | 26.4                                                      |
| 7.                                           | Chen et al. <sup>c</sup> [20]      | Peer reviewed | China         | 11 Apr 2020      | Retrospective | 55               | 19 (34.5)                 | 74                                      | 77                                               | 61.8            | 38.2              | 37 (67.3)                                                                                                | -                                                         |
| 8.                                           | Zhou et al. [21]                   | Peer reviewed | China         | 9 Mar 2020       | Retrospective | 191              | 54 (28.3)                 | 56 (46-67)                              | 69 (63-76)                                       | 62.0            | 38.0              | 91 (47.6)                                                                                                | 26.0                                                      |
| 9.                                           | Yuan et al. [67]                   | Peer reviewed | China         | 19 Mar 2020      | Retrospective | 27               | 10 (37.0)                 | 60 (47-69)                              | 68 (63-73)                                       | 45              | 55                | 13 (48.1)                                                                                                | -                                                         |
| 10.                                          | Chen et al. [68]                   | Preprint      | China         | 30 Mar 2020      | Retrospective | 123              | 5 (4.1)                   | 51 (35-66)                              | -                                                | 40.7            | 59.3              | 15 (12.2)                                                                                                | -                                                         |
| 11.                                          | Caramelo et al. <sup>d</sup> [69]  | Preprint      | China         | 25 Feb 2020      | Retrospective | -                | -                         | -                                       | -                                                | 51.4            | 48.6              | -                                                                                                        | -                                                         |
| 12.                                          | Ren et al. <sup>e</sup> [70]       | Peer reviewed | China         | 11 Feb 2020      | Retrospective | 5                | 1 (20.0)                  | 53.6                                    | 61                                               | 60.0            | 40.0              | 2 (40.0)                                                                                                 | 100                                                       |
| 13.                                          | Australian Govt. <sup>f</sup> [71] | Report        | Australia     | 5 Apr 2020       | Retrospective | 817              | 69 (5.3)                  | 59.5                                    | 79 (74-84)                                       | -               | -                 | -                                                                                                        | 13                                                        |
| 14.                                          | Shi et al. [41]                    | Peer reviewed | China         | 25 Mar 2020      | Retrospective | 416              | 57 (13.7)                 | 64 (21-95)                              | -                                                | 49.3            | 50.7              | -                                                                                                        | -                                                         |
| 15.                                          | Zhang et al. [11]                  | Peer reviewed | China         | 15 Apr 2020      | Retrospective | 663              | 25 (3.8)                  | 56 (44-69)                              | 67.1 (61-78)                                     | 48.4            | 51.6              | -                                                                                                        | 14.2                                                      |
| 16.                                          | Du et al. [72]                     | Peer reviewed | China         | 8 Apr 2020       | Prospective   | 179              | 21 (11.7)                 | 57.6 ± 13.7                             | 70.2 ± 7.7                                       | 54.2            | 45.8              | -                                                                                                        | -                                                         |
| 17.                                          | Wang et al. <sup>c</sup> [73]      | Peer reviewed | China         | 15 Mar 2020      | Retrospective | 339              | 65 (19.2)                 | 71 ± 8                                  | 76 (70-83)                                       | 49.0            | 51.0              | -                                                                                                        | 23.6                                                      |
| 18.                                          | Fu et al. [74]                     | Preprint      | China         | 16 Mar 2020      | Retrospective | 200              | 34 (17.0)                 | -                                       | -                                                | 49.5            | 50.5              | 161 (80.5)                                                                                               | 25.5                                                      |
| 19.                                          | Paranjpe et al. [75]               | Preprint      | USA           | 26 Apr 2020      | Prospective   | 889              | 310 (34.9)                | 65 (54-76)                              | 75 (64-85)                                       | 70.5            | 29.5              | -                                                                                                        | 43.3                                                      |
| 20.                                          | Cummings et al. <sup>e</sup> [76]  | Preprint      | USA           | 20 Apr 2020      | Prospective   | 257              | 86 (33.5)                 | 62 (51-72)                              | -                                                | 66.1            | 33.9              | -                                                                                                        | 100.0                                                     |
| 21.                                          | Guo et al. <sup>c</sup> [77]       | Preprint      | China         | 14 Apr 2020      | Retrospective | 118              | 51 (43.2)                 | 71.6                                    | 73.1 ± 7.3                                       | 44.9            | 55.1              | -                                                                                                        | -                                                         |
| 22.                                          | Zhu et al. [78]                    | Preprint      | China         | 8 Apr 2020       | Retrospective | 325              | 17 (5.2)                  | 45 (34-61)                              | 63 (57-76)                                       | 42.2            | 57.8              | 69 (21.2)                                                                                                | 18.5                                                      |
| 23.                                          | Yin et al. <sup>c</sup> [79]       | Preprint      | China         | 7 Apr 2020       | Retrospective | 112              | 52 (46.4)                 | 66 (56-76)                              | 70 (62-78)                                       | 68.7            | 31.3              | 71 (63.4)                                                                                                | 100.0                                                     |
| 24.                                          | Sun et al. <sup>c</sup> [80]       | Preprint      | China         | 6 Apr 2020       | Retrospective | 69               | 57 (82.6)                 | 66 (59-73)                              | 66 (62-77.5)                                     | 67.0            | 33.0              | 40 (58)                                                                                                  | 100.0                                                     |
| 25.                                          | Luo et al. [81]                    | Preprint      | China         | 24 Mar 2020      | Retrospective | 403              | 100 (24.8)                | 56 (39-68)                              | 71 (65-80)                                       | 47.9            | 52.1              | 175 (43.4)                                                                                               | 50.9                                                      |
| 26.                                          | Zhang et al. [82]                  | Preprint      | China         | 23 Mar 2020      | Retrospective | 315              | 47 (14.9)                 | 57 (44-66)                              | 66 (61-72)                                       | 55.6            | 44.4              | 103 (32.7)                                                                                               | 56.5                                                      |

|                                                 |                                       |               |                                 |             |                 |              |                    |                   |                   |             |             |                    |             |
|-------------------------------------------------|---------------------------------------|---------------|---------------------------------|-------------|-----------------|--------------|--------------------|-------------------|-------------------|-------------|-------------|--------------------|-------------|
| 27.                                             | Solis et al. [83]                     | Preprint      | Mexico                          | 25 Apr 2020 | Cross-sectional | 7497         | 650                | 46                | -                 | 57.9        | 42.1        | 3726 (49.7)        | -           |
| 28.                                             | Yao et al. [84]                       | Peer reviewed | China                           | 24 Apr 2020 | Retrospective   | 108          | 12 (11.1)          | 52 (37-58)        | 65 (51-73.5)      | 39.8        | 60.2        | 25 (23.1)          | 15.7        |
| 29.                                             | Zangrillo et al. [85]                 | Peer reviewed | Italy                           | 23 Apr 2020 | Prospective     | 73           | 17 (23.3)          | 61 (54-69)        | -                 | 83.6        | 16.4        | -                  | 45.2        |
| 30.                                             | Yan et al. [86]                       | Peer reviewed | China                           | 06 Apr 2020 | Retrospective   | 193          | 108 (56.0)         | 64 (49-73)        | 70 (62-78)        | 59.1        | 40.9        | 94 (48.7)          | 47.7        |
| 31.                                             | Tedeschi et al. [87]                  | Peer reviewed | Italy                           | 27 Apr 2020 | Prospective     | 609          | 174 (28.6)         | 68 (55-80)        | -                 | 68.0        | 32.0        | -                  | -           |
| 32.                                             | Nikpouraghdam et al. [88]             | Peer reviewed | Iran                            | 21 Apr 2020 | Retrospective   | 2878         | 239 (8.3)          | 55.5□±□15.2       | 65.4 ± □13.7      | 66.0        | 34.0        | 323 (10.9)         | -           |
| 33.                                             | Benelli et al. [89]                   | Preprint      | Italy                           | 30 Apr 2020 | Retrospective   | 411          | 72 (17.5)          | 66.8 ± 16.4       | 81.1 ± 7.5        | 66.6        | 33.4        | 256 (62.3)         | 6.8         |
| 34.                                             | Levy et al. [90]                      | Preprint      | USA                             | 30 Apr 2020 | Retrospective   | 4933         | 1185 (24.0)        | -                 | -                 | 58.4        | 41.6        | -                  | -           |
| 35.                                             | Sneep et al. [91]                     | Preprint      | UK                              | 29 Apr 2020 | Retrospective   | 200          | 28 (14.0)          | 63.4 ± 17.8       | 76 ± 14           | 57.5        | 42.5        | -                  | 11.0        |
| 36.                                             | Mehra et al. [9]                      | Peer reviewed | Asia, Europe, and North America | 01 May 2020 | Prospective     | 8910         | 515 (5.8)          | 48.7 ± 16.6       | 55.8 ± 15.1       | 59.6        | 40.4        | -                  | -           |
| <b>Studies included in the narrative review</b> |                                       |               |                                 |             |                 |              |                    |                   |                   |             |             |                    |             |
| 37.                                             | Grasselli et al. <sup>b, c</sup> [33] | Peer reviewed | Italy                           | 6 Apr 2020  | Retrospective   | 1591         | 405 (25.6)         | 63 (56-70)        | -                 | 82.0        | 18.0        | 1043 (65.6)        | 100.0       |
| 38.                                             | Du et al. <sup>g</sup> [29]           | Peer reviewed | China                           | 7 Apr 2020  | Prospective     | 109          | 109 (100)          | 70.7 ± 10.9       | 70.7 ± 10.9       | 67.9        | 32.1        | 85 (77.9)          | 46.8        |
| 39.                                             | Zhang et al. <sup>g</sup> [30]        | Preprint      | China                           | 27 Feb 2020 | Retrospective   | 82           | 82 (100)           | 72 (65-80)        | 72.5 (65-80)      | 65.9        | 34.1        | 62 (75.6)          | 17.1        |
| 40.                                             | Kim et al. <sup>g</sup> [31]          | Preprint      | Korea                           | 20 Apr 2020 | Retrospective   | 101          | 101 (100)          | 76 ± 10.3         | 76 ± 10.3         | 52.5        | 47.5        | 100 (99.1)         | 84.2        |
| 41.                                             | Yao et al. <sup>c, g</sup> [32]       | Preprint      | China                           | 13 Mar 2020 | Retrospective   | 55           | 55 (100)           | 70.7 ± 13.5       | 70.7 ± 13.5       | 67.0        | 33.0        | 43 (78)            | 100.0       |
| 42.                                             | Cheng et al. [34]                     | Peer reviewed | China                           | 20 Mar 2020 | Prospective     | 701          | 113 (16.1)         | 63 (50-71)        | -                 | 52.4        | 47.6        | 297 (42.4)         | 10.4        |
| <b>Total or average</b>                         |                                       |               |                                 |             |                 | <b>36398</b> | <b>5310 (14.6)</b> | <b>60.5 ± 8.0</b> | <b>69.9 ± 5.6</b> | <b>60.1</b> | <b>39.9</b> | <b>7558 (42.5)</b> | <b>38.4</b> |

**Note:** Sample with missing value were excluded from percentage calculation; <sup>a</sup> Complete data available for 17794 patients, and missing sample had incomplete information or directly indicated the likelihood of mortality or did not report people count with any forms of existing comorbidities; <sup>b</sup> Included only the patients in ICU or in critical condition with or without pre-existing morbidities, and data was available for 10154 patients; <sup>c</sup> included only aged or elderly people as sample; <sup>d</sup> Not included in total calculation as the study was a secondary data analysis; <sup>e</sup> Included only the patients in ICU or in critical condition; <sup>f</sup> this study included only hospitalized patients. <sup>g</sup> Sample included only death patients; Study of Tedeschi et al [87] had all patients more than one comorbidities.

**Table 2.** Percentage distribution of comorbidities among patients reported in admission COVID-19 infection.

| <b>Pre-existing morbidities</b>                | <b>Distribution of comorbidities for total patients</b> | <b>(%)</b>   |
|------------------------------------------------|---------------------------------------------------------|--------------|
| <b><i>Cardiovascular system disease</i></b>    | <b>12760</b>                                            | <b>51.2</b>  |
| Hypertension                                   | 9085                                                    | 36.5         |
| Cardiovascular Disease <sup>a</sup>            | 2957                                                    | 11.9         |
| Arrhythmia                                     | 393                                                     | 1.6          |
| Heart failure                                  | 325                                                     | 1.3          |
| <b><i>Immune and metabolic disorders</i></b>   | <b>5966</b>                                             | <b>23.9</b>  |
| Diabetes                                       | 5478                                                    | 22.0         |
| Immunosuppression                              | 406                                                     | 1.6          |
| Autoimmune disease                             | 8                                                       | 0.03         |
| Immunodeficiency                               | 3                                                       | 0.01         |
| Metabolic disorder                             | 4                                                       | 0.02         |
| <b><i>Respiratory system diseases</i></b>      | <b>1975</b>                                             | <b>7.9</b>   |
| Chronic lung disease                           | 1010                                                    | 4.1          |
| Chronic obstructive pulmonary disease (COPD)   | 577                                                     | 2.3          |
| Asthma                                         | 355                                                     | 1.4          |
| Acute respiratory distress syndrome (ARDS)     | 11                                                      | 0.04         |
| Chronic bronchitis                             | 10                                                      | 0.04         |
| Tuberculosis                                   | 9                                                       | 0.04         |
| Pulmonary emphysema                            | 3                                                       | 0.01         |
| <b><i>Any types of cancer</i></b>              | <b>224</b>                                              | <b>0.9</b>   |
| Malignancy                                     | 33                                                      | 0.1          |
| Cancer                                         | 92                                                      | 0.4          |
| Tumor                                          | 16                                                      | 0.1          |
| Carcinoma                                      | 4                                                       | 0.02         |
| <b><i>Cerebrovascular system diseases</i></b>  | <b>198</b>                                              | <b>0.8</b>   |
| Cerebrovascular disease <sup>b</sup>           | 189                                                     | 0.8          |
| Peripheral vascular disease                    | 9                                                       | 0.04         |
| <b><i>Renal system diseases</i></b>            | <b>779</b>                                              | <b>3.1</b>   |
| Chronic kidney disease                         | 758                                                     | 3.0          |
| Urinary disease                                | 21                                                      | 0.1          |
| <b><i>Liver system diseases</i></b>            | <b>2844</b>                                             | <b>11.4</b>  |
| Chronic liver disease                          | 45                                                      | 0.2          |
| Cirrhosis                                      | 25                                                      | 0.1          |
| Fatty liver disease                            | 15                                                      | 0.1          |
| Hepatitis B                                    | 21                                                      | 0.1          |
| Hyperlipidemia                                 | 2732                                                    | 11.0         |
| Inflammatory disease                           | 6                                                       | 0.02         |
| <b><i>Gastrointestinal system diseases</i></b> | <b>61</b>                                               | <b>0.2</b>   |
| Chronic digestive disorder                     | 21                                                      | 0.1          |
| Gastrointestinal disease                       | 40                                                      | 0.2          |
| <b>Others <sup>c</sup></b>                     | <b>109</b>                                              | <b>0.4</b>   |
| <b>Grand total</b>                             | <b>24916</b>                                            | <b>100.0</b> |

**Note:** Patients with more than one comorbidity were missing. Calculated in column percentage format; One study (Caramelo et al.) was excluded from prevalence calculation as the study had not reported frequency of comorbidities; Malnutrition and dementia was skipped from the analysis as we found only one patient (Yang et al.); <sup>a</sup> Included all types of cardiovascular diseases like coronary heart diseases or artery disease; <sup>b</sup> Included Cerebral infarction; <sup>c</sup> anemia, bowel disease, tissue disease, etc.

**Table 3.** Summary effects of type of morbidity categories on death among patients infected with COVID-19, publication bias, and Trim and Fill

| Characteristics                  | Number of studies | Number of times morbidity reported | Summary estimates             |                               | Egger bias test p-value | Trim and Fill estimates <sup>a</sup> |                  |
|----------------------------------|-------------------|------------------------------------|-------------------------------|-------------------------------|-------------------------|--------------------------------------|------------------|
|                                  |                   |                                    | OR (95% CI)                   | Heterogeneity Index ( $I^2$ ) |                         | Missing studies no.                  | OR (95% CI)      |
| Cardiovascular system diseases   | 33                | 64                                 | 3.32 (2.79-3.95) <sup>b</sup> | 83.8%                         | 0.001                   | 13                                   | 2.82 (2.38-3.34) |
| Immune and metabolic disorders   | 31                | 38                                 | 2.39 (2.00-2.85) <sup>b</sup> | 64.5%                         | 0.019                   | 6                                    | 2.14(1.78-2.57)  |
| Respiratory system diseases      | 28                | 33                                 | 2.02 (1.80-2.26) <sup>c</sup> | 71.2%                         | 0.031                   | 3                                    | 2.36 (1.79-3.11) |
| Any types of cancer              | 20                | 20                                 | 2.22 (1.63-3.03) <sup>c</sup> | 67.7%                         | 0.891                   | 0                                    | 2.22 (1.63-3.03) |
| Cerebrovascular system diseases  | 15                | 16                                 | 4.12 (3.04-5.58) <sup>c</sup> | 25.7%                         | 0.048                   | 2                                    | 3.94 (2.92-5.31) |
| Renal system diseases            | 21                | 21                                 | 3.02 (2.60-3.51) <sup>c</sup> | 56.0%                         | 0.024                   | 4                                    | 2.86 (2.47-3.32) |
| Liver system diseases            | 14                | 17                                 | 1.44 (1.21-1.71) <sup>c</sup> | 0.0%                          | 0.001                   | 6                                    | 1.38 (1.16-1.63) |
| Gastrointestinal system diseases | 5                 | 5                                  | 1.33 (0.56-3.19) <sup>c</sup> | 0.0%                          | 0.170                   | 0                                    | 1.33 (0.56-3.19) |

estimates

**Note:** Person survived from COVID-19 infection is considered as reference category; CI, confidence interval; OR, odds ratio.

<sup>a</sup> The trim-and-fill method simulates studies that are likely to be missing from the literature due to publication or other forms of bias. The trim-and-fill OR estimates what the pooled OR would be if these missing studies were included in the analysis; <sup>b</sup> Summary estimates were based on fixed-effects methods; <sup>c</sup> Summary estimates were based on random-effects methods.

**Table 4.** Stratified analysis of the likelihood of death among patients with cardiovascular system diseases infected with COVID-19

| Characteristics                 | Pooled OR (95% CI)             | P             |                 |
|---------------------------------|--------------------------------|---------------|-----------------|
|                                 |                                | Heterogeneity | Meta-regression |
| <b>Type of diseases</b>         |                                |               |                 |
| Cardiovascular diseases         | 3.35 (2.53-4.42)               | <0.01         | 0.95            |
| Hypertension                    | 3.28 (2.53-4.24)               | <0.01         |                 |
| Heart failure                   | 3.98 (2.96-5.34)               | 0.348         |                 |
| Arrythmia                       | 3.00 (1.96-4.57)               | 0.192         |                 |
| <b>Study country</b>            |                                |               |                 |
| Australia                       | 3.68 (2.06-6.57) <sup>++</sup> | NA            | <0.01           |
| Italy                           | 3.95 (2.82-5.54)               | <b>0.239</b>  |                 |
| China                           | 4.36 (3.40-5.58)               | <0.01         |                 |
| United State of America         | 2.74 (2.00-3.75)               | <0.01         |                 |
| Asia, Europe, and North America | 1.98 (1.16-3.38)               | <0.01         |                 |
| Iran                            | 1.75 (0.95-3.22)               | 0.685         |                 |
| UK                              | 2.73 (1.17-6.35) <sup>++</sup> | NA            |                 |
| Mexico                          | 1.12 (0.71-1.75)               | <0.05         |                 |
| <b>Study design</b>             |                                |               |                 |
| Cross-sectional                 | 3.79 (2.86-5.03)               | <0.01         | <0.05           |
| Prospective cohort              | 3.15 (2.25-4.41)               | <0.01         |                 |
| Retrospective cohort            | 1.82 (0.71-1.75)               | <0.05         |                 |
| <b>Adjustment factor</b>        |                                |               |                 |
| Unadjusted                      | 3.94 (3.24-4.80)               | <0.01         | <0.05           |
| Adjusted                        | 1.81 (1.30-2.53)               | <0.01         |                 |
| <b>Sample size</b>              |                                |               |                 |
| >1134                           | 2.19 (1.59-3.02)               | <0.01         | <0.01           |
| ≤1134                           | 3.78 (3.14-4.56)               | <0.01         |                 |
| <b>Mean age of total sample</b> |                                |               |                 |
| ≤60                             | 3.70 (2.70-5.07)               | <0.01         | 0.593           |
| >60                             | 3.14 (2.60-3.80)               | <0.01         |                 |
| <b>Mean age of death sample</b> |                                |               |                 |
| ≤69                             | 4.39 (3.05-6.32)               | <0.01         | 0.100           |
| >69                             | 3.00 (2.46-3.66)               | <0.01         |                 |

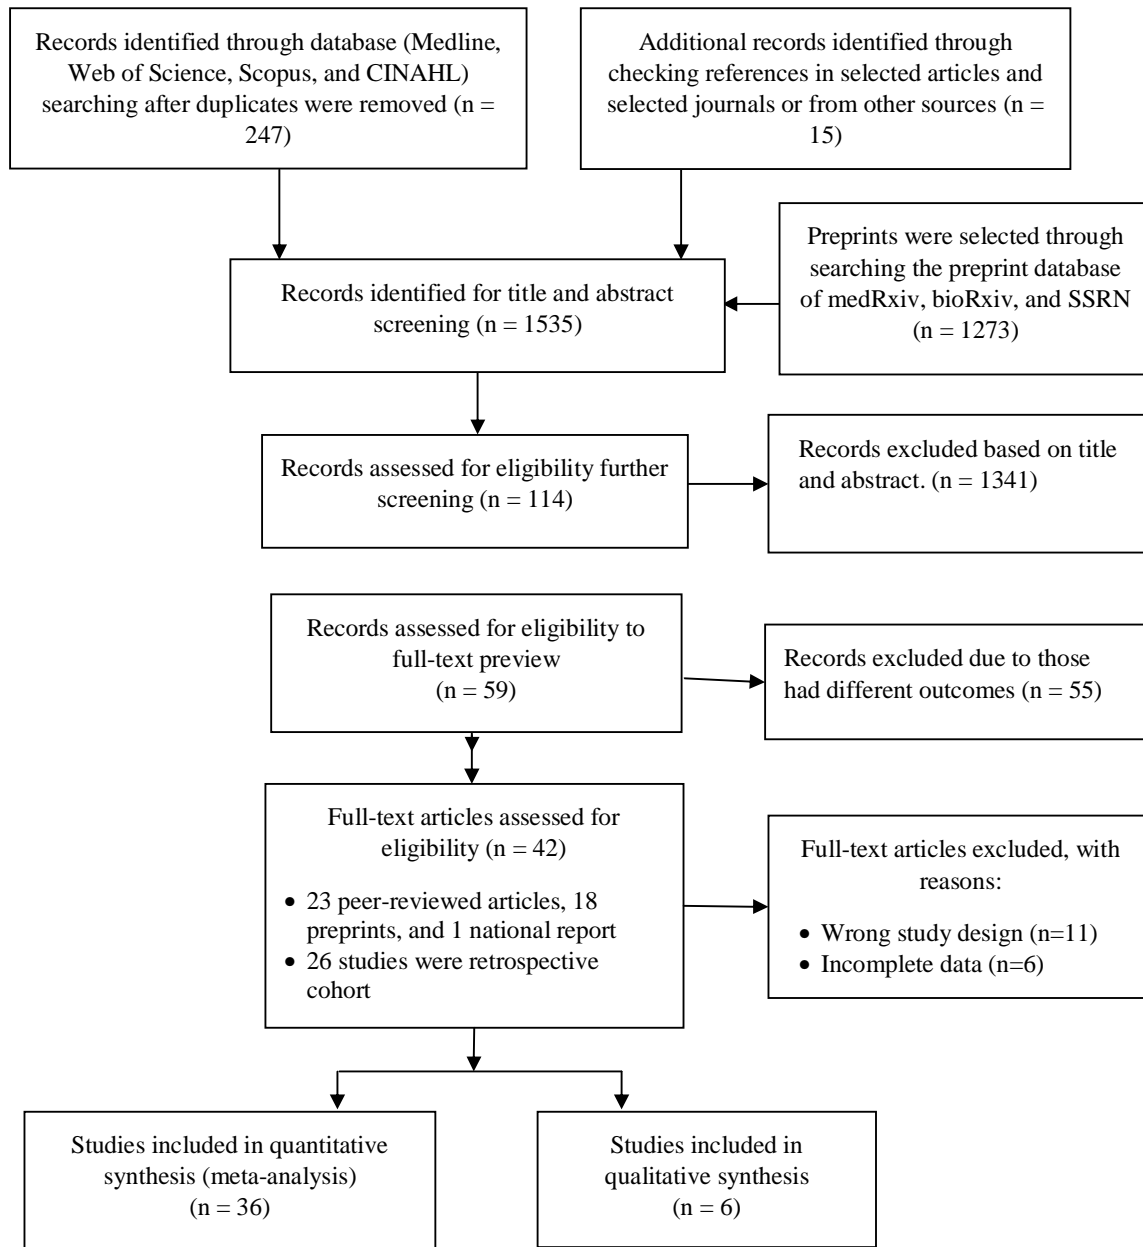

**Figure 1.** Schematic representation of studies included in the systematic review and meta-analysis using PRISMA checklist and flow diagram

## Supplementary figures

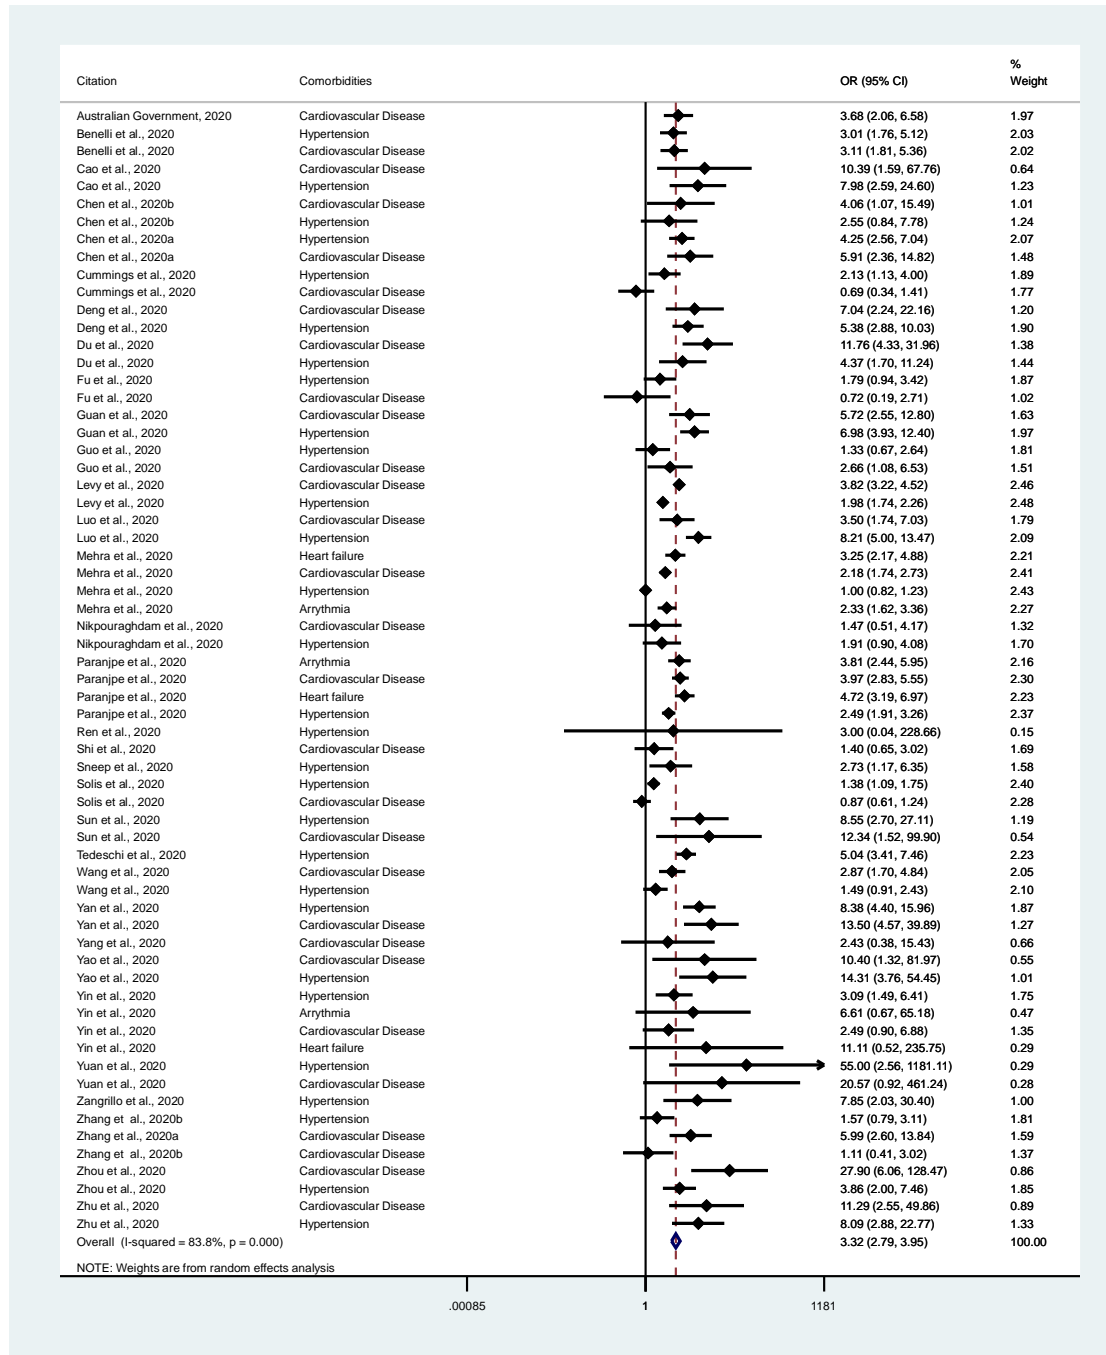

**Supplementary Figure 1:** Likelihoods of death among patients with cardiovascular system diseases infected further with COVID-19 disease

(a)

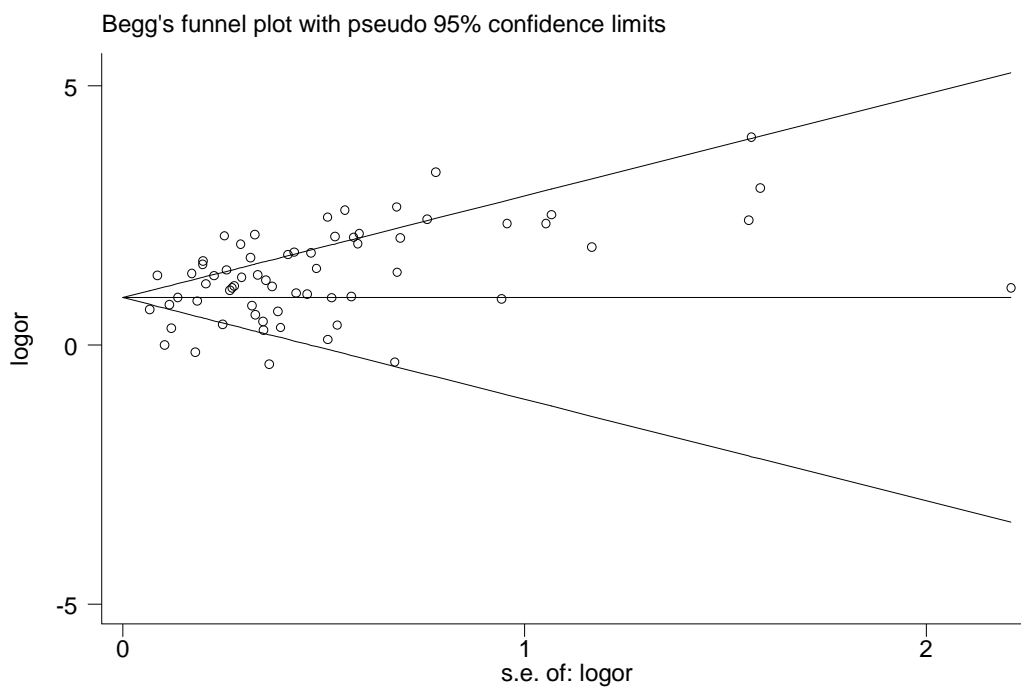

(b)

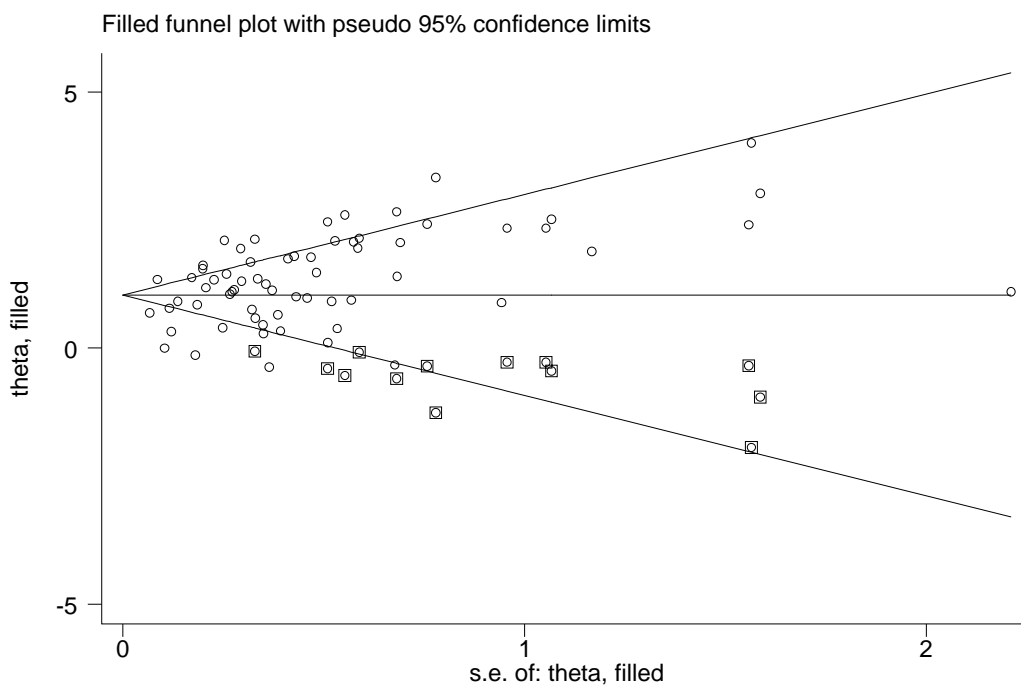

**Supplementary Figure 1a:** Funnel plot without (a) and with trim and fill (b) estimate for cardiovascular systems diseases patients infected further with COVID-19 disease



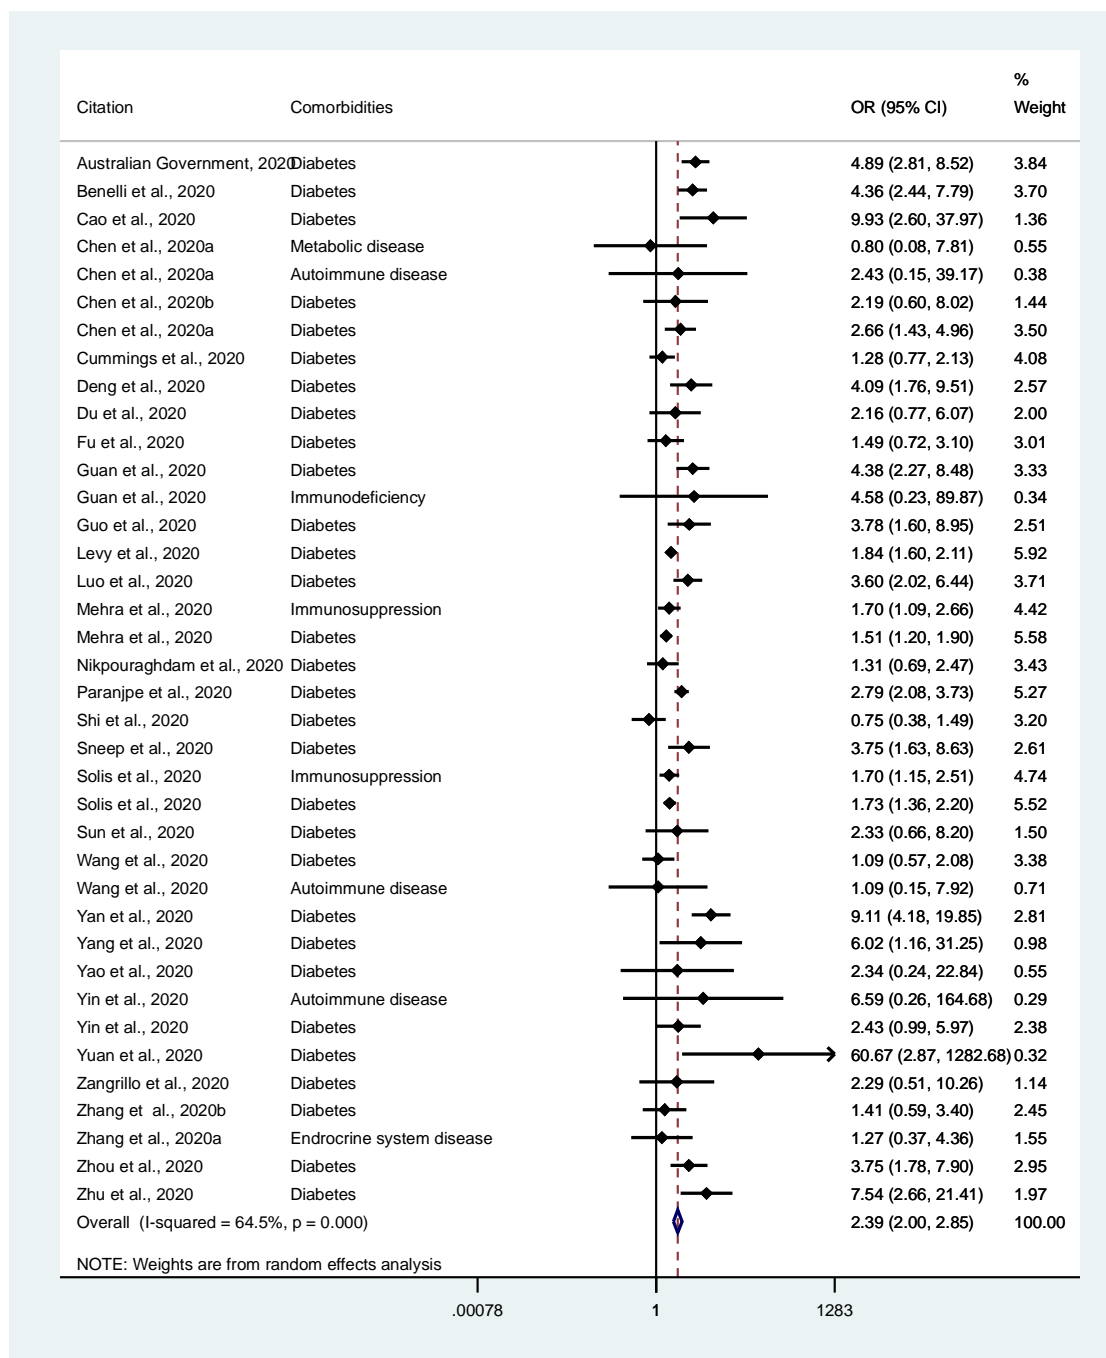

**Supplementary Figure 2:** Likelihoods of death among patients with Immune and metabolic disorders patients infected further with COVID-19 disease

(a)

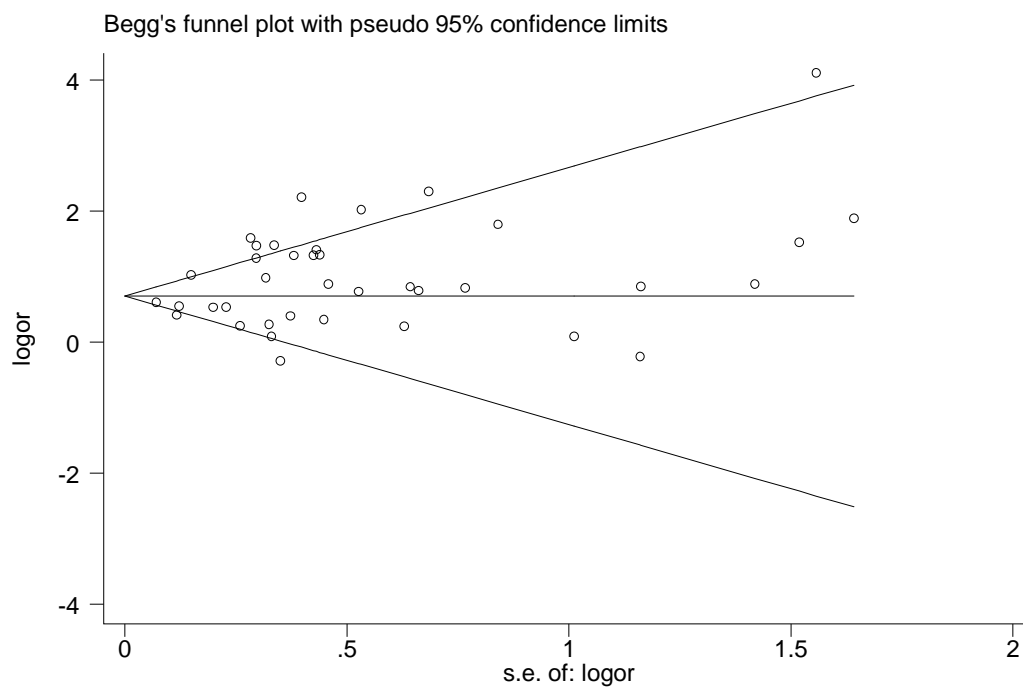

(b)

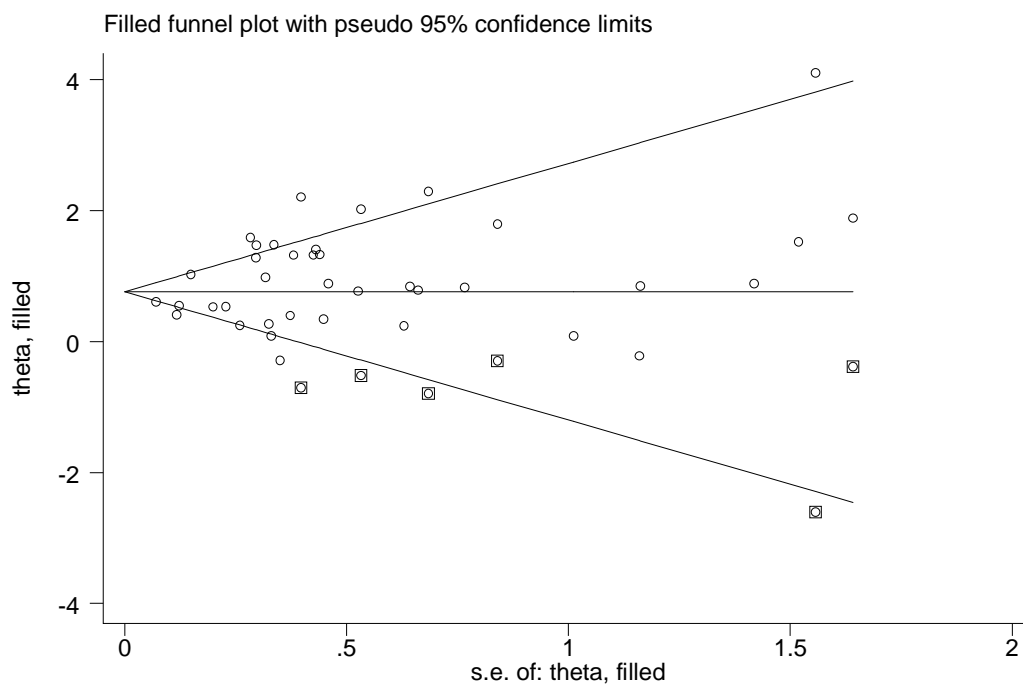

**Supplementary Figure 2a:** Funnel plot without (a) and with trim and fill (b) estimate for Immune and metabolic disorders patients infected further with COVID-19 disease

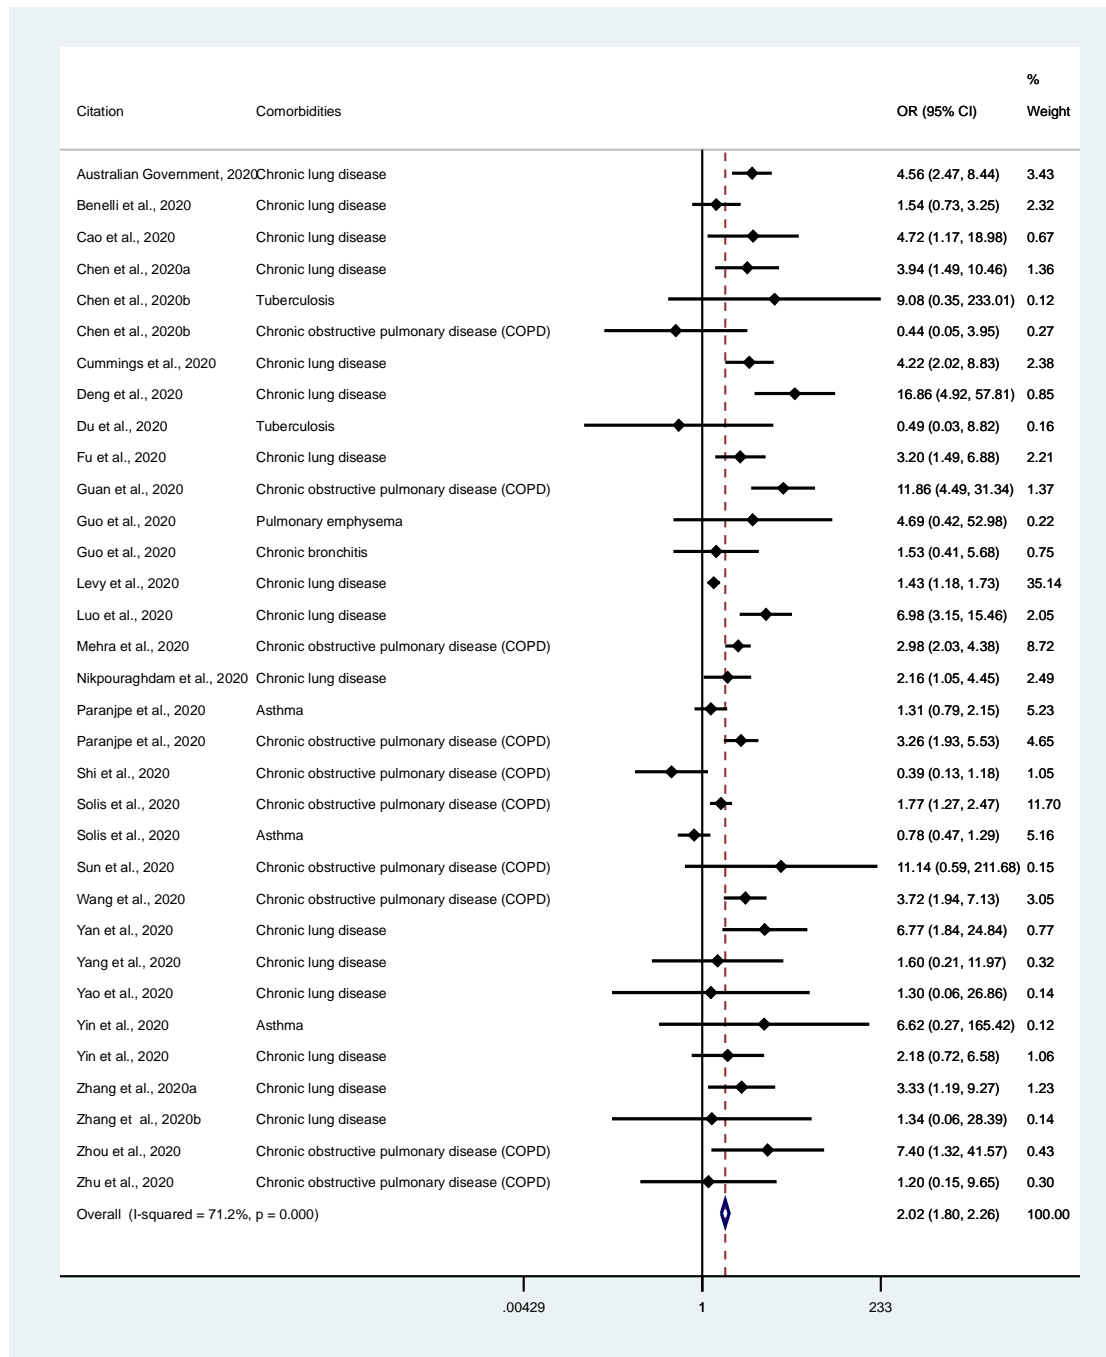

**Supplementary figure 3:** Likelihoods of death among patients with respiratory system diseases patients infected further with COVID-19 disease

(a)

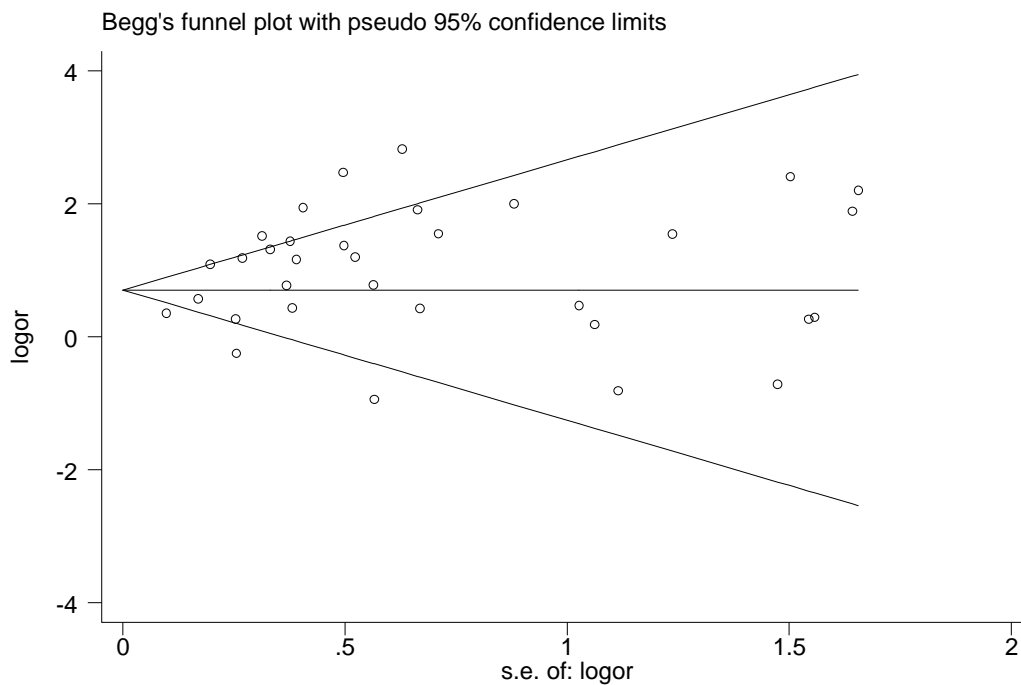

(b)

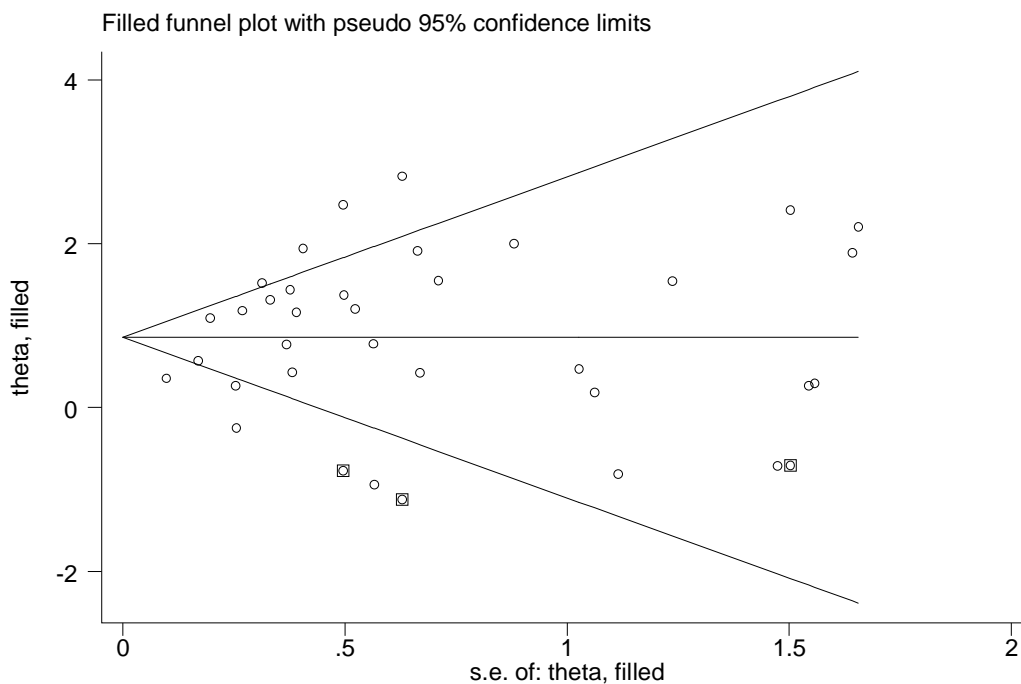

**Supplementary Figure 3a:** Funnel plot without (a) and with trim and fill (b) estimate for Respiratory system diseases patients infected further with COVID-19 disease

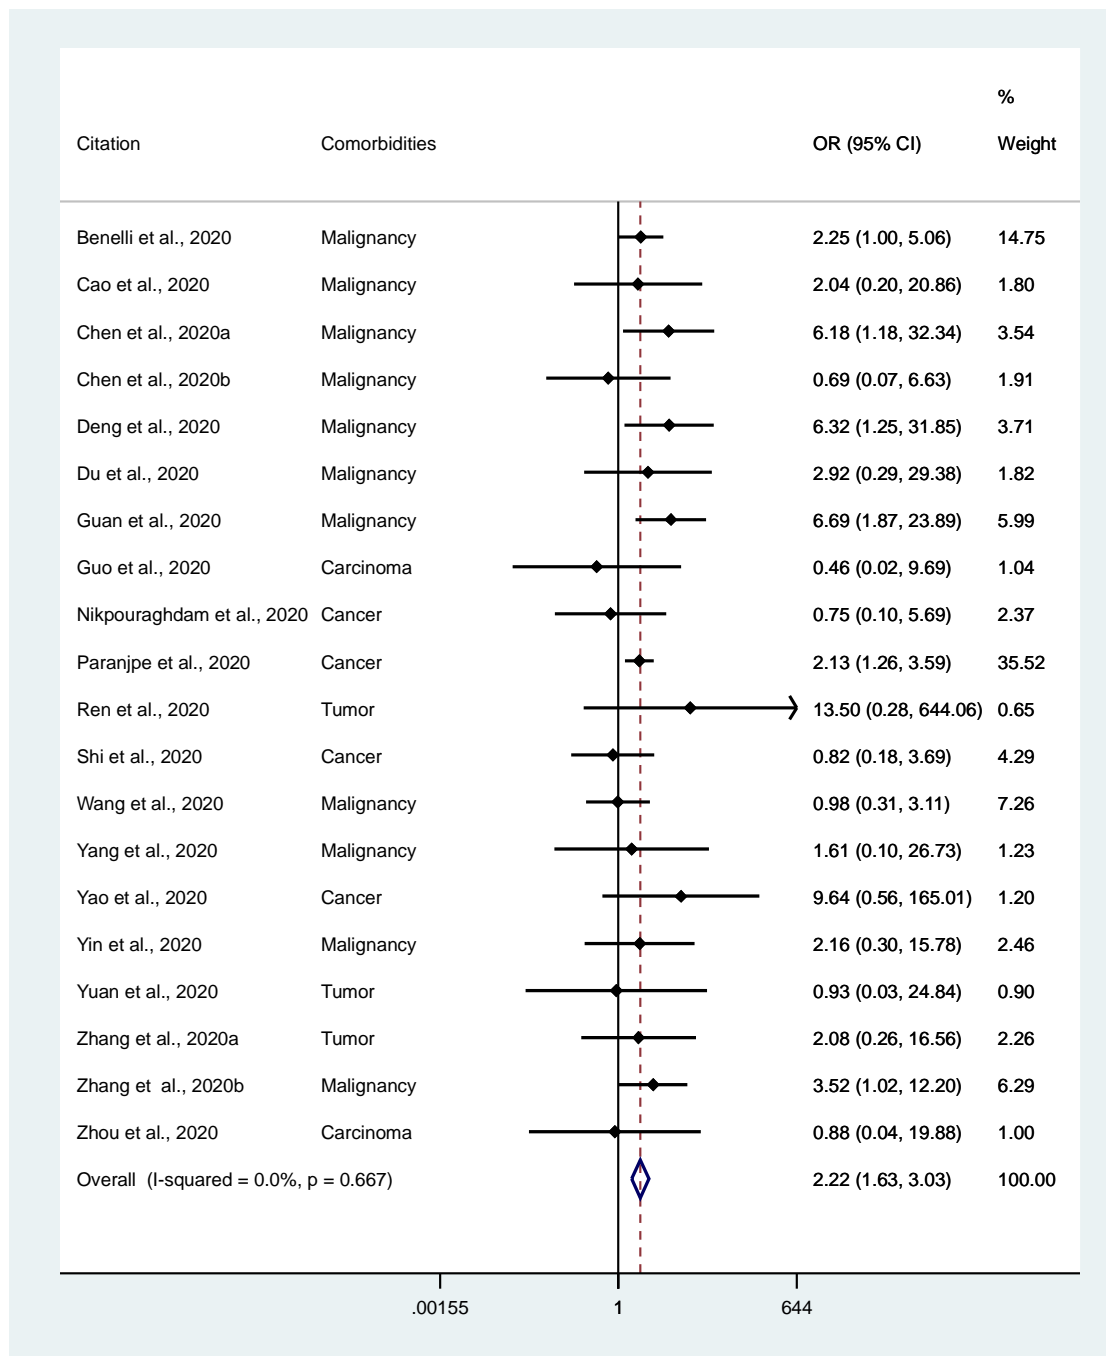

**Supplementary figure 4:** Likelihoods of death among patients with any type of cancers infected further with COVID-19 disease

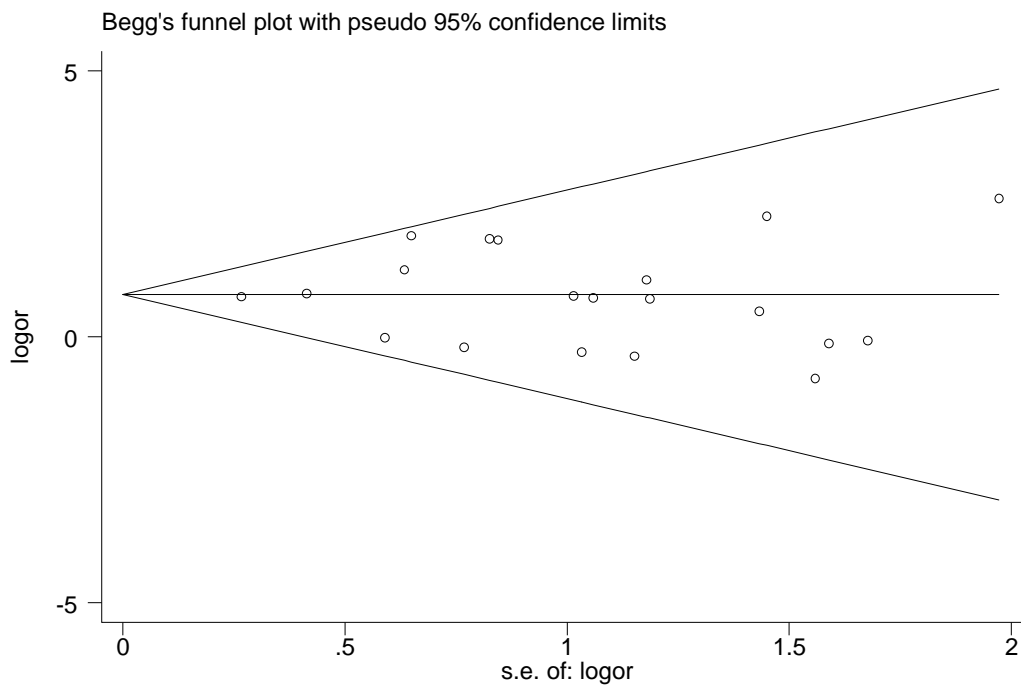

**Supplementary Figure 4A:** Funnel plot for patients with any type of cancers infected further with COVID-19 disease

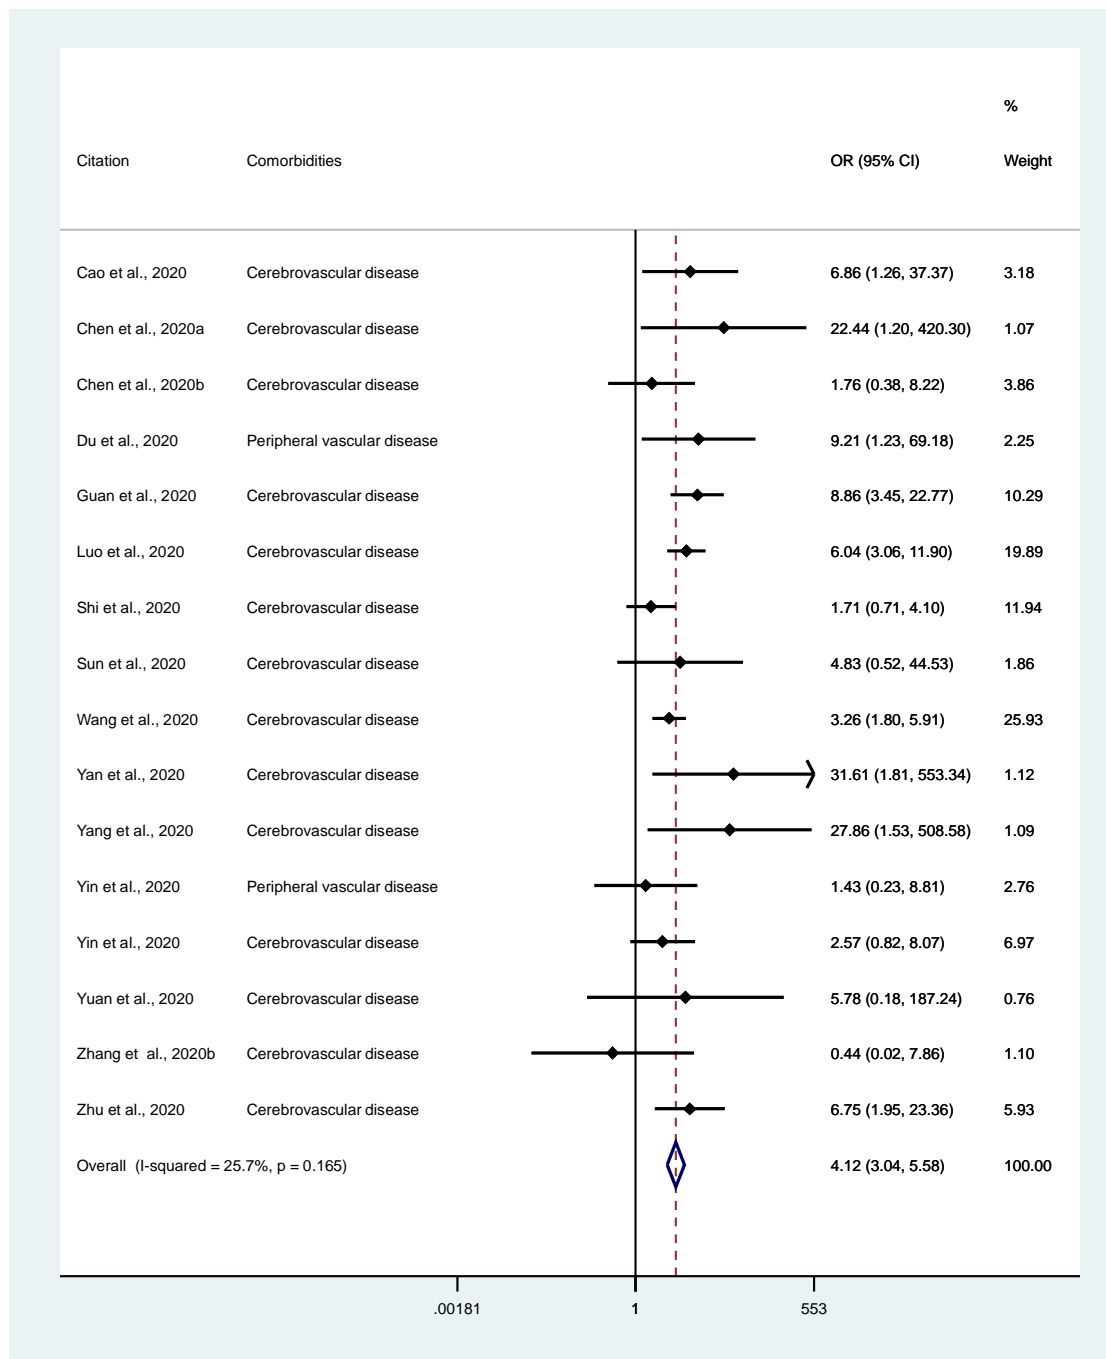

**Supplementary figure 5:** Likelihoods of death among patients with cerebrovascular system diseases patients infected further with COVID-19 disease

(a)

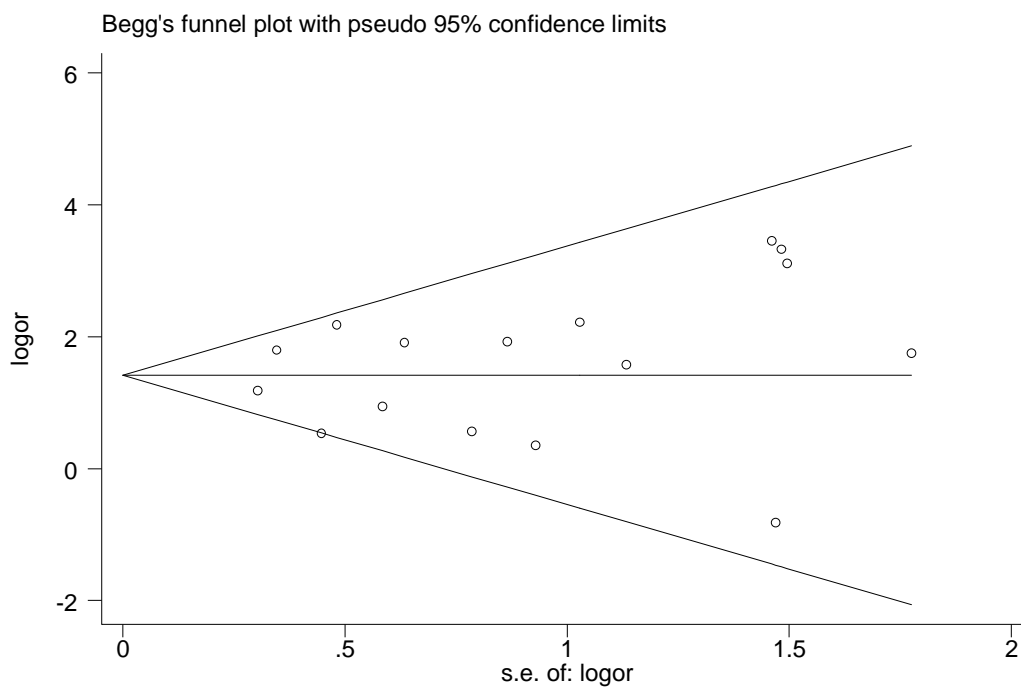

(b)

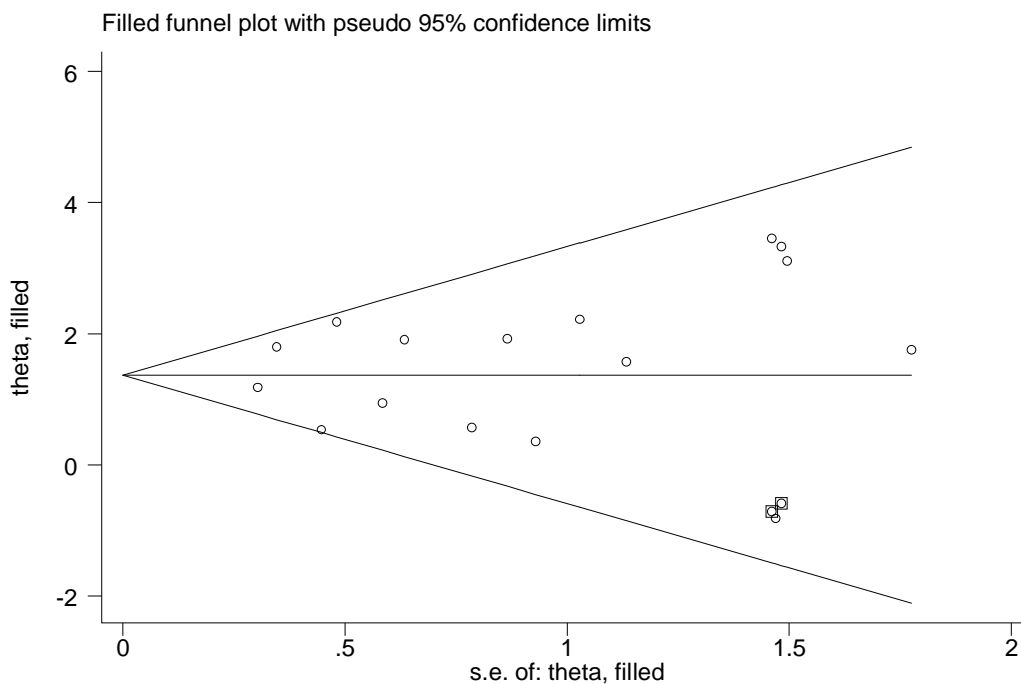

**Supplementary Figure 5A:** Funnel plot without (a) and with trim and fill (b) estimate for Cerebrovascular system diseases patients infected further with COVID-19 disease



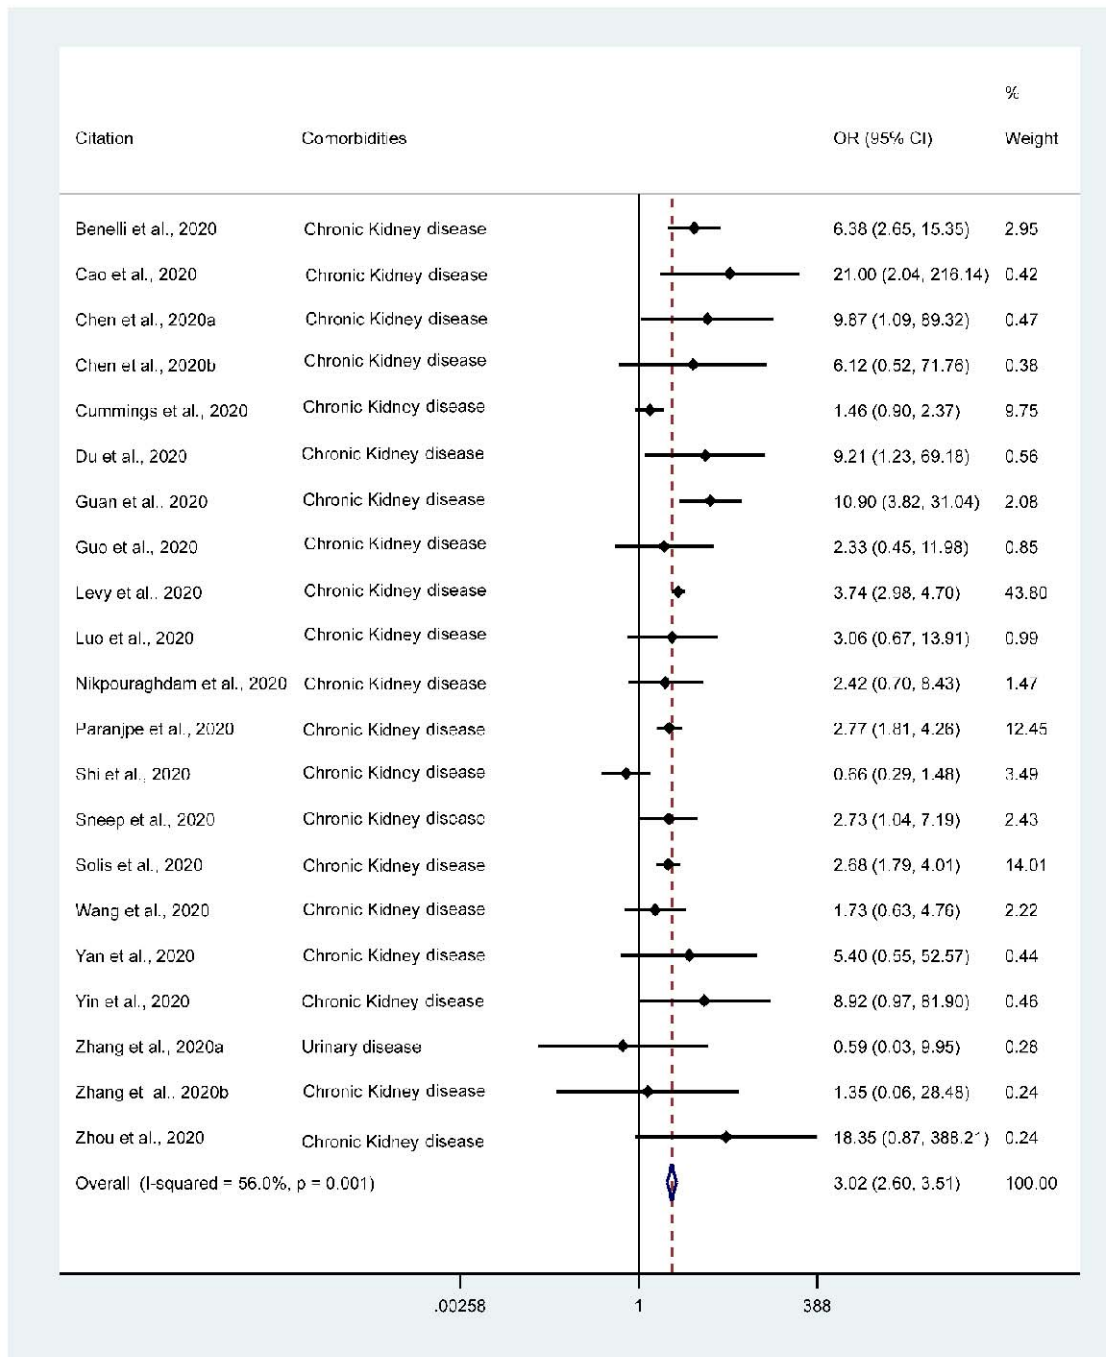

**Supplementary figure 6:** Likelihoods of death among patients with renal system diseases infected further with COVID-19 disease

(a)

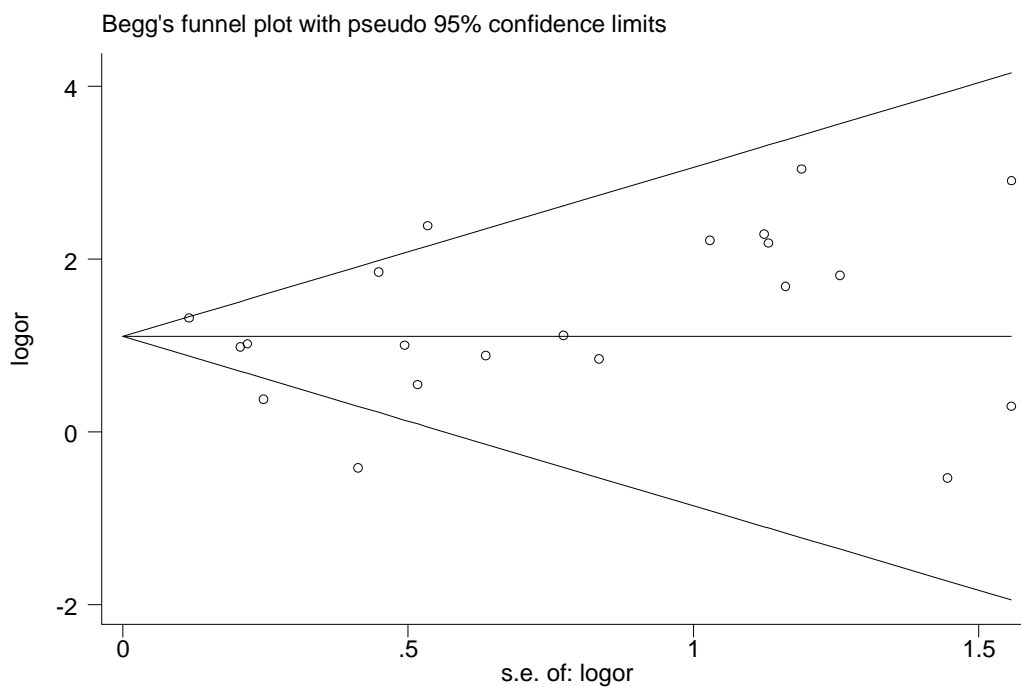

(b)

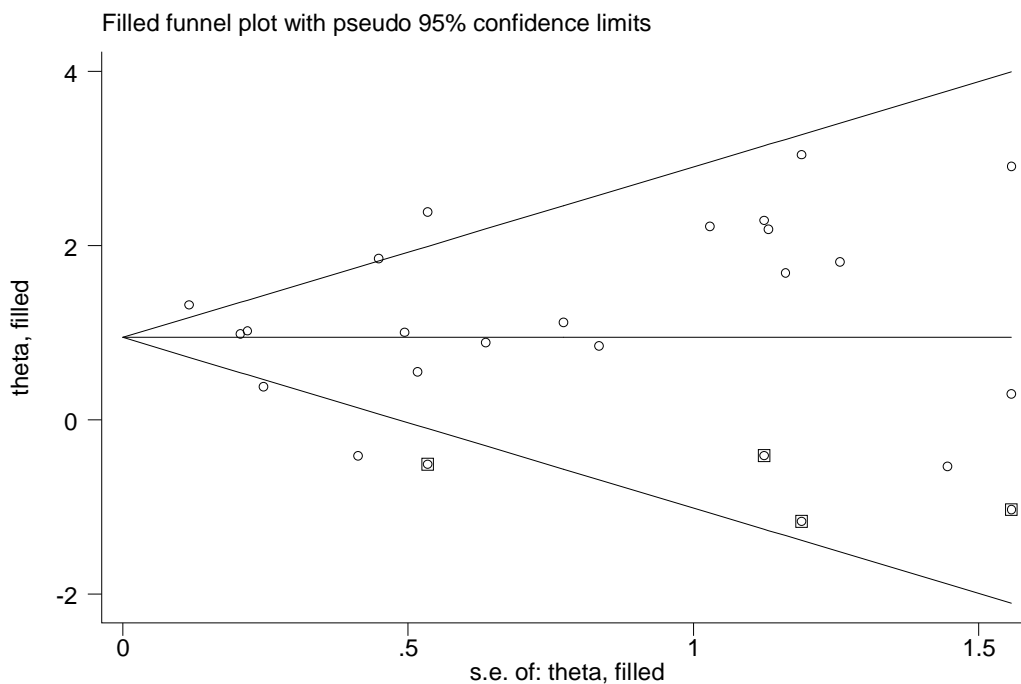

**Supplementary Figure 6A:** Funnel plot without (a) and with trim and fill (b) estimate for renal system diseases patients infected further with COVID-19 disease

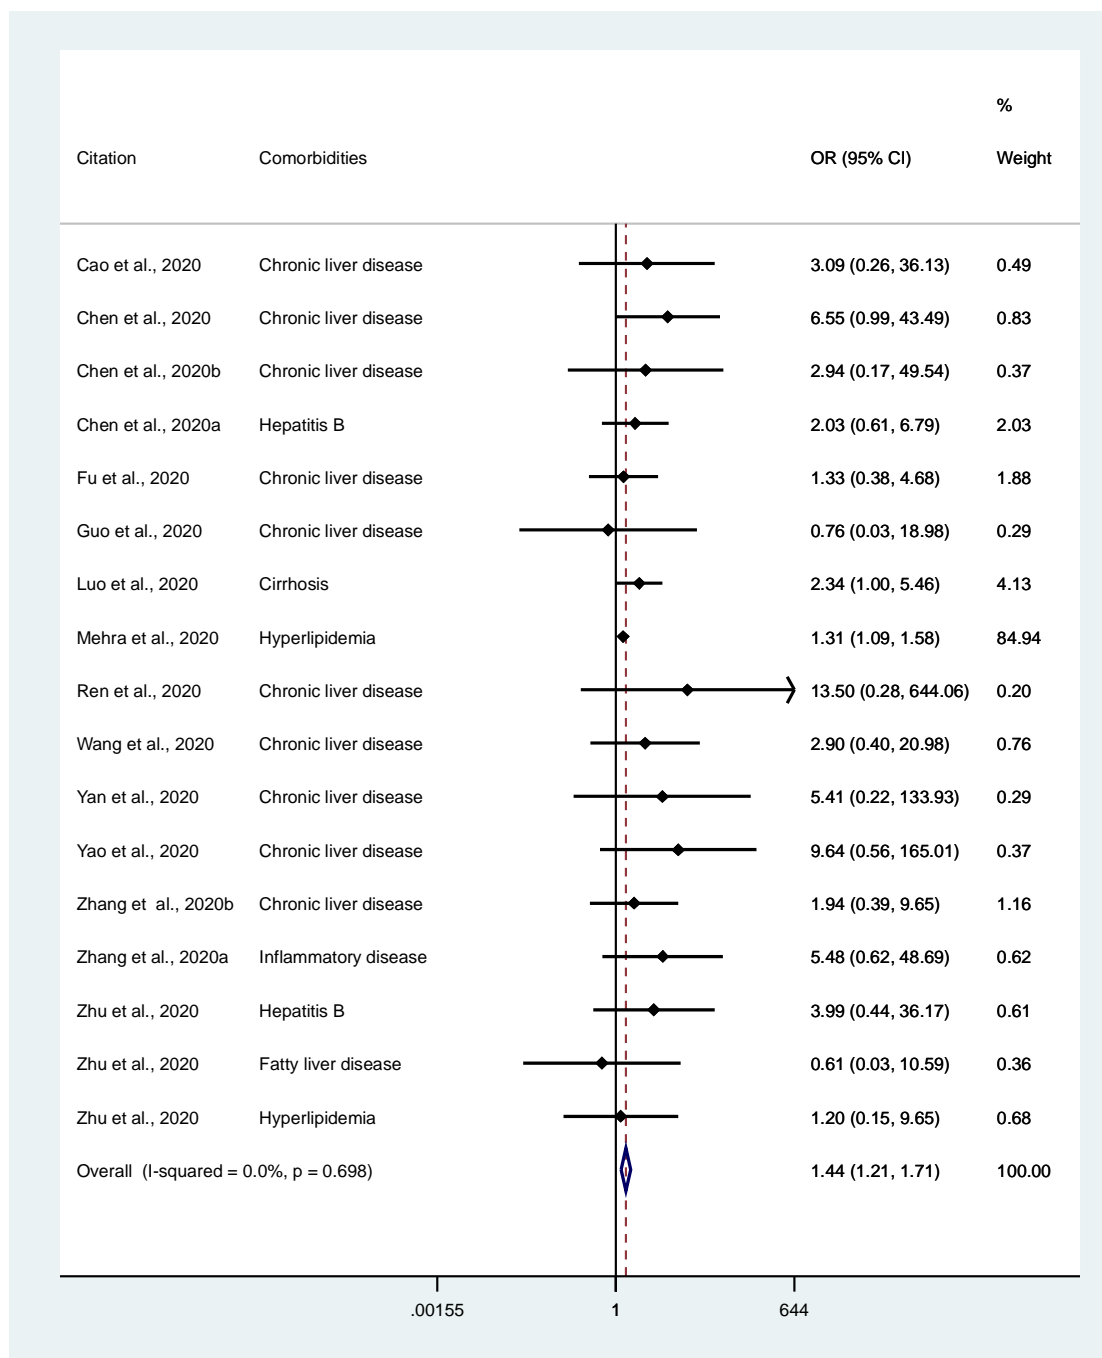

**Supplementary figure 7:** Likelihoods of death among patients with existing liver system diseases patients infected further with COVID-19 disease

(a)

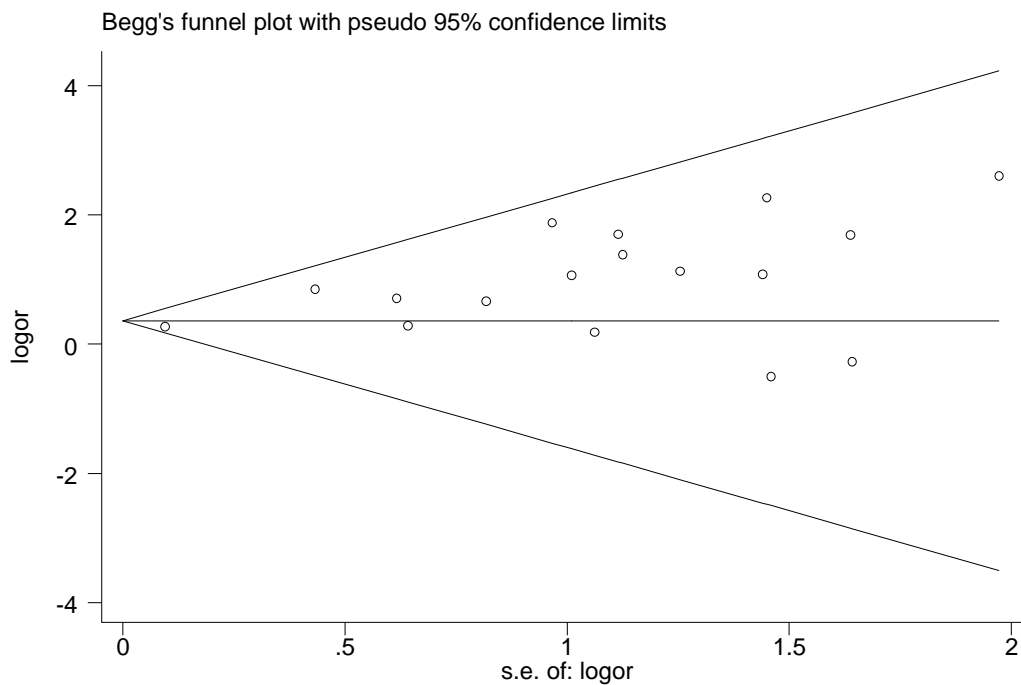

(b)

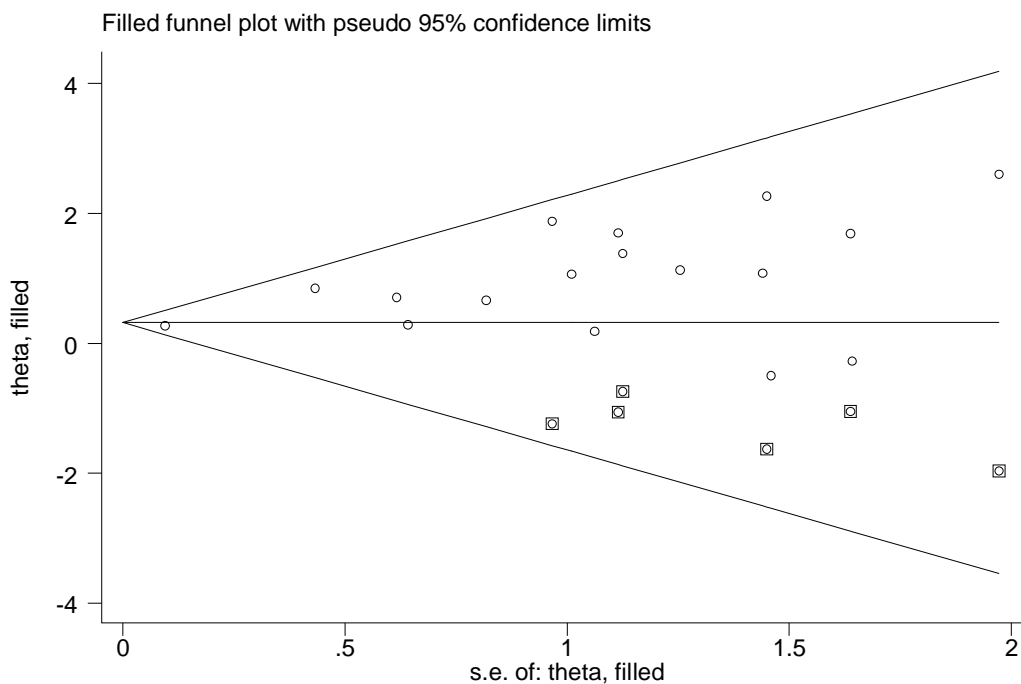

**Supplementary Figure 8A:** Funnel plot without (a) and with trim and fill (b) estimate for liver system diseases patients infected further with COVID-19 disease

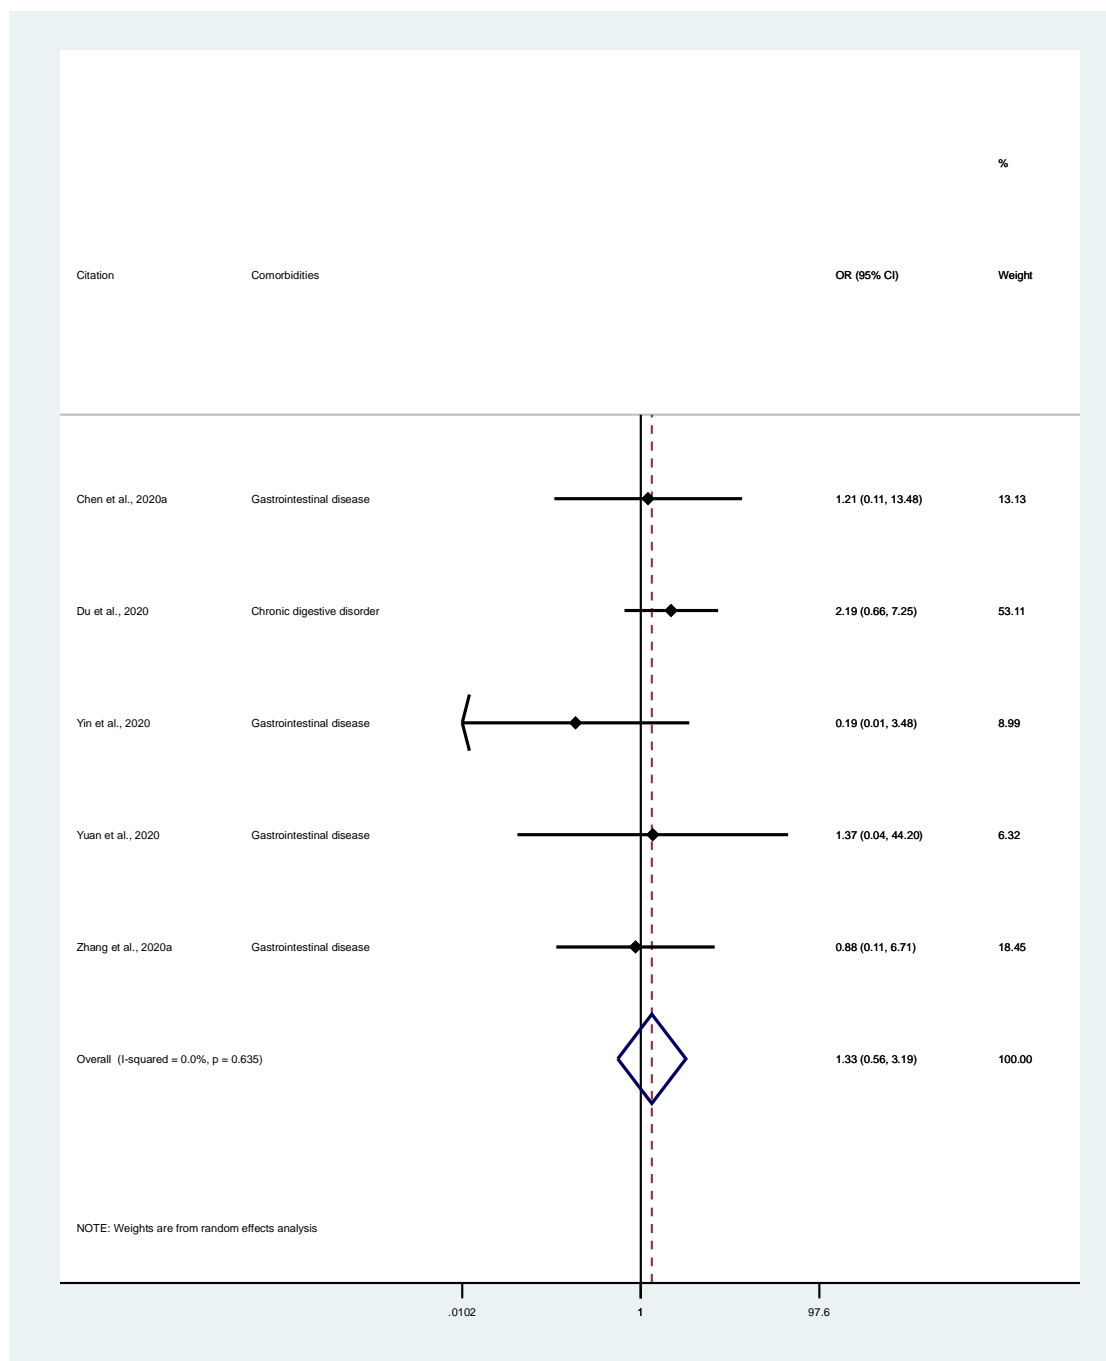

**Supplementary figure 8:** Likelihoods of death among patients with existing gastrointestinal system diseases patients infected further with COVID-19 disease

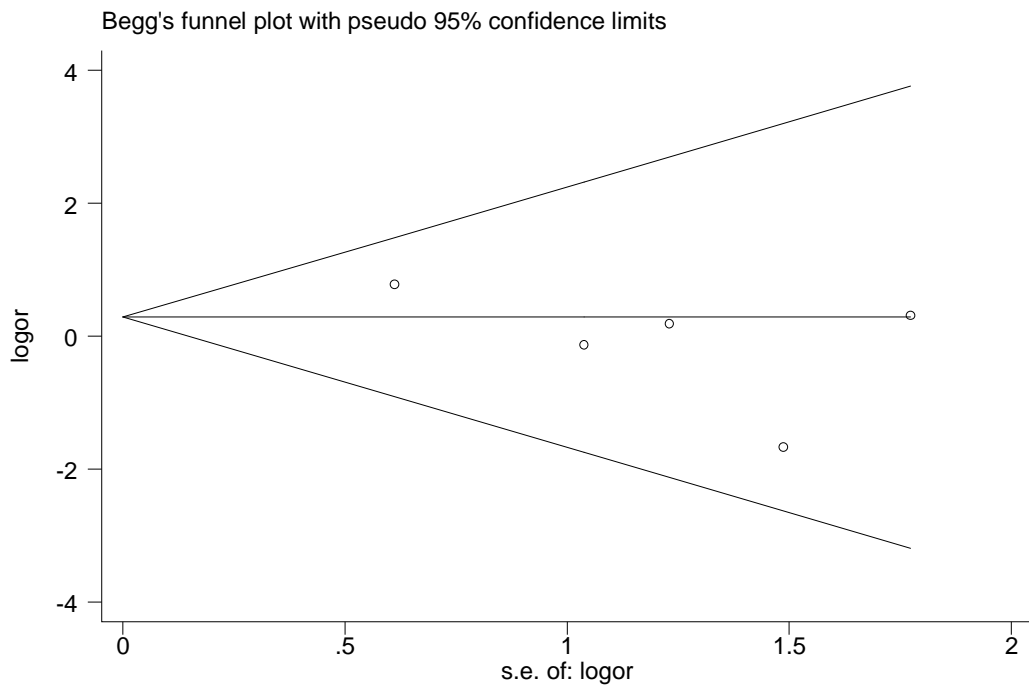

**Supplementary Figure 8a:** Funnel plot for gastrointestinal system diseases patients infected further with COVID-19 disease

## Effects of underlying morbidities on the occurrence of deaths in COVID-19 patients: A systematic review and meta-analysis

**Supplemental Table 1.** Medline search results for pre-existing morbidities among COVID-19 patients

| # | Searches                                                                                                                                                                                                                                                                                                                                     | Results |
|---|----------------------------------------------------------------------------------------------------------------------------------------------------------------------------------------------------------------------------------------------------------------------------------------------------------------------------------------------|---------|
| 1 | (COVID-19 or 2019-nCoV or Coronavirus or SARS-CoV-2).mp. [mp=title, abstract, original title, name of substance word, subject heading word, floating sub-heading word, keyword heading word, organism supplementary concept word, protocol supplementary concept word, rare disease supplementary concept word, unique identifier, synonyms] | 17285   |
| 2 | (Comorbidit* or Morbidit*).mp. [mp=title, abstract, original title, name of substance word, subject heading word, floating sub-heading word, keyword heading word, organism supplementary concept word, protocol supplementary concept word, rare disease supplementary concept word, unique identifier, synonyms]                           | 573824  |
| 3 | (Mortalit* or Death or Died*).mp. [mp=title, abstract, original title, name of substance word, subject heading word, floating sub-heading word, keyword heading word, organism supplementary concept word, protocol supplementary concept word, rare disease supplementary concept word, unique identifier, synonyms]                        | 1826650 |
| 4 | 1 and 2 and 3                                                                                                                                                                                                                                                                                                                                | 433     |
| 5 | limit 4 to (english language and yr="2019 -Current")                                                                                                                                                                                                                                                                                         | 146     |

**Supplemental Table 2.** CINAHL search results for pre-existing morbidities among COVID-19 patients

| #  | Query                                                                                                                             | Limiters/Expanders                                                                                                                               | Last Run Via                                                                                                       | Results |
|----|-----------------------------------------------------------------------------------------------------------------------------------|--------------------------------------------------------------------------------------------------------------------------------------------------|--------------------------------------------------------------------------------------------------------------------|---------|
| S1 | “( covid-19 OR 2019-ncov OR coronavirus OR sars-cov-2 )<br>AND ( comorbidit* OR morbidit* ) AND ( mortalit* OR deat*<br>OR died ) | Limiters - Published Date: 20191201-20200431; English Language<br><br>Expanders - Apply equivalent subjects<br><br>Search modes - Boolean/Phrase | Interface - EBSCOhost<br>Research Databases<br>Search Screen -<br>Advanced Search<br>Database - CINAHL<br>Complete | 19      |



**Supplemental Table 3.** Web of science search results for pre-existing morbidities among COVID-19 patients

| Search terms                                                                                                                                                                                                                                          | Results |
|-------------------------------------------------------------------------------------------------------------------------------------------------------------------------------------------------------------------------------------------------------|---------|
| (covid-19 OR 2019-ncov OR coronavirus OR sars-cov-2) AND TOPIC: (comorbidit* OR morbidit*) AND TOPIC: (mortalit* OR deat* OR died)<br><b>Timespan:</b> 2019-2020. <b>Indexes:</b> SCI-EXPANDED, SSCI, A&HCI, CPCI-S, CPCI-SSH, ESCI, CCR-EXPANDED, IC | 64      |

**Supplemental Table 4.** SCOPUS search results for pre-existing comorbidities and the mortality risk in COVID-19

| Search strategy                                                                                                                                                                                                  | Results |
|------------------------------------------------------------------------------------------------------------------------------------------------------------------------------------------------------------------|---------|
| TITLE-ABS-KEY ((( covid-19 OR 2019-ncov OR coronavirus OR sars-cov-2 ) AND ( comorbidit* OR morbidit* ) AND ( mortalit* OR death* OR died ))) AND ( LIMIT-TO ( PUBYEAR , 2020 ) OR LIMIT-TO ( PUBYEAR , 2019 ) ) | 142     |

**Supplemental Table 5.** Narrative review for pre-existing morbidities and mortality risk among patients in COVID-19 infection.

| Study                  | Study design, Country       | Sample                                                                                                                        | Results                                                                                                                                                                                                                                                                                                                                 |
|------------------------|-----------------------------|-------------------------------------------------------------------------------------------------------------------------------|-----------------------------------------------------------------------------------------------------------------------------------------------------------------------------------------------------------------------------------------------------------------------------------------------------------------------------------------|
| Grasselli et al., 2020 | Retrospective cohort, Italy | Total of 1591 COVID-19 patients admitted into ICU in 72 hospitals from 20 February to 18 March 2020                           | Around 49% of the patients had hypertension, 21% had cardiovascular disease, 18% had hypercholesterolemia, 17% had type-2 diabetes, and 8% had malignancy. A total of 405 (26%) patients died. Around 38% of the patients with hypertension were died in ICU as compared to 16% discharged.                                             |
| Du et al., 2020        | Prospective cohort, China   | Total of 109 died COVID-19 patients from three hospitals in Wuhan, China. Data were collected from 25 Dec to 15 February 2020 | COVID-19 patients who were died mostly had pre-existing hypertension (59.6%), cardiovascular disease (33.9%), diabetes (31.2%), digestive disorders (16%), chronic respiratory diseases (15.6%), malignancy (7.3%), chronic kidney disease (7.3%), 7.3% had peripheral vascular disease.                                                |
| Zhang et al., 2020     | Retrospective cohort, China | Total of 82 died COVID-19 patients admitted Wuhan University's hospital from 11 January to 10 February 2020.                  | Patients died following secondary COVID-19 mostly had pre-existing hypertension (56.1%) following cardiovascular disease (20.7%), diabetes (18.3%), immunodeficiency (17.1%) chronic respiratory diseases (14.6%), cerebrovascular disease (12.2%), malignancy (7.3%), chronic kidney disease (4.9%), and chronic liver disease (2.4%). |
| Kim et al., 2020       | Retrospective cohort, Korea | Sample consisting of 101 deceased patients from February 19 to March 20, 2020                                                 | COVID-19 patients who were died mostly had pre-existing hypertension (64.4%), cardiovascular disease (21.8%), diabetes (43.6%), digestive disorders (16%), chronic respiratory diseases (27.7%), dementia (25.7), dyslipidaemia (15.8%), cerebrovascular disease (15.8%), malignancy (15.8%), and renal diseases (14.8%).               |
| Yao et al., 2020       | Retrospective cohort, China | Sample of 55 patients who died were collected from East Hospital of Wuhan University as of February 18, 2020                  | Patients died following secondary COVID-19 mostly had pre-existing hypertension (60%) diabetes (26%), cardiovascular (31%), cerebrovascular disease (22%), malignancy (7%), chronic lung diseases (22%), chronic kidney disease (9%), and chronic liver disease (6%).                                                                   |
| Cheng et al., 2020     | Prospective cohort, China   | Total of 701 COVID-19 patients from China                                                                                     | Around 16.1% (113 person) died in hospital. Patients with acute kidney injury were reported higher risk of death with a gradual increase across stages of injury: stage 1 (HR, 3.51; 95% CI, 1.53-8.02), stage 2 (HR, 6.24; 95% CI, 2.73-14.27), stage 3 (HR, 9.81; 95% CI, 5.46-17.65).                                                |

**Supplemental Table 6.** Newcastle-Ottawa scale assessment of study quality for **cross-sectional study**

| Author             | Selection                        |             |                           |                 | Comparability                                                                                                                       |                       | Outcome                         |   | Study quality |
|--------------------|----------------------------------|-------------|---------------------------|-----------------|-------------------------------------------------------------------------------------------------------------------------------------|-----------------------|---------------------------------|---|---------------|
|                    | 1                                | 2           | 3                         | 4               | 5                                                                                                                                   | 6                     | 7                               |   |               |
|                    | Representativeness of the sample | Sample size | Ascertainment of exposure | Non-respondents | The subjects in different outcome groups are comparable, based on the study design or analysis. Confounding factors are controlled. | Assessment of outcome | Statistical test is appropriate |   |               |
| Solis et al., 2020 | *                                | *           | *                         |                 | *                                                                                                                                   |                       | *                               | 5 |               |

**Supplemental Table 7.** Newcastle-Ottawa scale assessment of study quality for **cohort study**

| Author            | Selection                           |                                                  |                           |                                          | Comparability                      |                                       | Outcome                       |                                             |                                 | Study quality |
|-------------------|-------------------------------------|--------------------------------------------------|---------------------------|------------------------------------------|------------------------------------|---------------------------------------|-------------------------------|---------------------------------------------|---------------------------------|---------------|
|                   | 1                                   | 2                                                | 3                         | 4                                        | 5A                                 | 5B                                    | 6                             | 7                                           | 8                               |               |
|                   | Exposed cohort truly representative | Non-exposed cohort drawn from the same community | Ascertainment of exposure | Outcome of interest not present at start | Cohorts comparable on basis of age | Cohorts comparable on other factor(s) | Quality of outcome assessment | Follow-up long enough for outcomes to occur | Complete accounting for cohorts |               |
| Guan et al., 2020 | *                                   | *                                                | *                         |                                          | *                                  | *                                     | *                             | *                                           | *                               | 8             |
| Cao et al., 2020  | *                                   | *                                                | *                         |                                          | *                                  | *                                     | *                             | *                                           | *                               | 8             |
| Chen et al., 2020 | *                                   | *                                                | *                         |                                          | *                                  | *                                     | *                             | *                                           | *                               | 8             |
| Deng et al., 2020 | *                                   | *                                                | *                         |                                          |                                    | *                                     | *                             | *                                           | *                               | 7             |

|                              |   |   |   |   |  |   |   |  |   |   |   |   |
|------------------------------|---|---|---|---|--|---|---|--|---|---|---|---|
| Yang et al., 2020            | * | * | * |   |  | * | * |  | * | * | * | 8 |
| Wu et al., 2020              |   | * | * |   |  |   | * |  | * | * | * | 6 |
| Chen et al., 2020            | * | * | * |   |  | * | * |  | * | * | * | 8 |
| Zhou et al., 2020            | * | * | * |   |  | * | * |  | * | * | * | 8 |
| Yuan et al., 2020            | * | * | * |   |  |   | * |  | * | * | * | 7 |
| Chen et al., 2020            | * |   | * | * |  |   | * |  | * | * |   | 6 |
| Caramelo et al., 2020        | * |   |   |   |  | * | * |  |   | * | * | 5 |
| Ren et al., 2020             | * | * | * |   |  | * | * |  | * | * | * | 8 |
| Australian Government., 2020 | * | * |   |   |  | * | * |  | * | * | * | 7 |
| Shi et al., 2020             | * |   | * |   |  | * | * |  |   | * | * | 6 |
| Zhang et al., 2020           | * | * |   | * |  | * | * |  | * | * |   | 7 |
| Du et al., 2020              | * | * | * |   |  | * | * |  | * | * | * | 8 |
| Wang et al., 2020            | * | * | * | * |  | * | * |  |   | * | * | 8 |
| Fu et al., 2020              | * | * |   |   |  | * | * |  |   | * | * | 6 |
| Paranjpe et al., 2020        | * | * | * |   |  |   | * |  | * | * |   | 6 |
| Cummings et al., 2020        | * | * | * |   |  | * | * |  | * | * |   | 7 |
| Guo et al., 2020             |   | * | * | * |  |   | * |  |   | * | * | 6 |
| Zhu et al., 2020             | * |   |   | * |  | * | * |  | * | * |   | 6 |
| Yin et al., 2020             |   | * | * | * |  |   | * |  | * | * | * | 7 |
| Sun et al., 2020             |   | * | * | * |  |   |   |  | * | * |   | 5 |

|                            |   |   |   |   |  |   |   |  |   |   |   |   |
|----------------------------|---|---|---|---|--|---|---|--|---|---|---|---|
| Luo et al., 2020           | * | * | * |   |  | * | * |  | * | * | * | 8 |
| Zhang et al., 2020         | * | * | * | * |  |   | * |  | * | * | * | 8 |
| Yao et al., 2020           |   | * | * | * |  | * | * |  | * | * |   | 7 |
| Zangrillo et al., 2020     |   | * | * | * |  | * | * |  | * | * |   | 7 |
| Yan et al., 2020           |   | * | * | * |  | * | * |  | * |   |   | 6 |
| Tedeschi et al., 2020      |   | * | * | * |  | * |   |  | * | * |   | 6 |
| Nikpouraghdam et al., 2020 | * | * | * | * |  | * | * |  | * | * |   | 8 |
| Benelli et al., 2020       | * | * | * |   |  | * | * |  | * | * |   | 7 |
| Levy et al., 2020          | * | * | * | * |  | * | * |  | * | * |   | 8 |
| Sneep et al., 2020         |   | * | * |   |  | * |   |  | * | * |   | 5 |
| Mehra et al., 2020         | * | * | * | * |  | * | * |  | * | * | * | 9 |
| Grasselli et al., 2020     | * |   | * | * |  |   | * |  | * | * |   | 6 |
| Du et al., 2020            | * |   | * | * |  | * | * |  | * | * |   | 7 |
| Zhang et al., 2020         | * |   | * | * |  | * | * |  | * | * |   | 7 |
| Kim et al., 2020           | * |   | * |   |  | * | * |  | * | * |   | 6 |
| Yao et al., 2020           | * |   | * |   |  | * | * |  | * | * |   | 6 |
| Cheng et al., 2020         | * |   | * |   |  |   | * |  | * | * | * | 6 |

| Section/topic             | #  | Checklist item                                                                                                                                                                                                                                                                                              | Reported on page #         |
|---------------------------|----|-------------------------------------------------------------------------------------------------------------------------------------------------------------------------------------------------------------------------------------------------------------------------------------------------------------|----------------------------|
| <b>TITLE</b>              |    |                                                                                                                                                                                                                                                                                                             |                            |
| Title                     | 1  | Identify the report as a systematic review, meta-analysis, or both.                                                                                                                                                                                                                                         | 1                          |
| <b>ABSTRACT</b>           |    |                                                                                                                                                                                                                                                                                                             |                            |
| Structured summary        | 2  | Provide a structured summary including, as applicable: background; objectives; data sources; study eligibility criteria, participants, and interventions; study appraisal and synthesis methods; results; limitations; conclusions and implications of key findings; systematic review registration number. | 1-2                        |
| <b>INTRODUCTION</b>       |    |                                                                                                                                                                                                                                                                                                             |                            |
| Rationale                 | 3  | Describe the rationale for the review in the context of what is already known.                                                                                                                                                                                                                              | 3                          |
| Objectives                | 4  | Provide an explicit statement of questions being addressed with reference to participants, interventions, comparisons, outcomes, and study design (PICOS).                                                                                                                                                  | 4                          |
| <b>METHODS</b>            |    |                                                                                                                                                                                                                                                                                                             |                            |
| Protocol and registration | 5  | Indicate if a review protocol exists, if and where it can be accessed (e.g., Web address), and, if available, provide registration information including registration number.                                                                                                                               | NA                         |
| Eligibility criteria      | 6  | Specify study characteristics (e.g., PICOS, length of follow-up) and report characteristics (e.g., years considered, language, publication status) used as criteria for eligibility, giving rationale.                                                                                                      | 5                          |
| Information sources       | 7  | Describe all information sources (e.g., databases with dates of coverage, contact with study authors to identify additional studies) in the search and date last searched.                                                                                                                                  | 4                          |
| Search                    | 8  | Present full electronic search strategy for at least one database, including any limits used, such that it could be repeated.                                                                                                                                                                               | 4, Supplementary table 1-4 |
| Study selection           | 9  | State the process for selecting studies (i.e., screening, eligibility, included in systematic review, and, if applicable, included in the meta-analysis).                                                                                                                                                   | 5                          |
| Data collection process   | 10 | Describe method of data extraction from reports (e.g., piloted forms, independently, in duplicate) and any processes for obtaining and confirming data from investigators.                                                                                                                                  | 5                          |

|                                    |    |                                                                                                                                                                                                                        |    |
|------------------------------------|----|------------------------------------------------------------------------------------------------------------------------------------------------------------------------------------------------------------------------|----|
| Data items                         | 11 | List and define all variables for which data were sought (e.g., PICOS, funding sources) and any assumptions and simplifications made.                                                                                  | 5  |
| Risk of bias in individual studies | 12 | Describe methods used for assessing risk of bias of individual studies (including specification of whether this was done at the study or outcome level), and how this information is to be used in any data synthesis. | NA |
| Summary measures                   | 13 | State the principal summary measures (e.g., risk ratio, difference in means).                                                                                                                                          | 7  |
| Synthesis of results               | 14 | Describe the methods of handling data and combining results of studies, if done, including measures of consistency (e.g., $I^2$ ) for each meta-analysis.                                                              | 7  |

| Section/topic                 | #  | Checklist item                                                                                                                                                                                           | Reported on page # |
|-------------------------------|----|----------------------------------------------------------------------------------------------------------------------------------------------------------------------------------------------------------|--------------------|
| Risk of bias across studies   | 15 | Specify any assessment of risk of bias that may affect the cumulative evidence (e.g., publication bias, selective reporting within studies).                                                             | NA                 |
| Additional analyses           | 16 | Describe methods of additional analyses (e.g., sensitivity or subgroup analyses, meta-regression), if done, indicating which were pre-specified.                                                         | 6                  |
| <b>RESULTS</b>                |    |                                                                                                                                                                                                          |                    |
| Study selection               | 17 | Give numbers of studies screened, assessed for eligibility, and included in the review, with reasons for exclusions at each stage, ideally with a flow diagram.                                          | 7                  |
| Study characteristics         | 18 | For each study, present characteristics for which data were extracted (e.g., study size, PICOS, follow-up period) and provide the citations.                                                             | 7                  |
| Risk of bias within studies   | 19 | Present data on risk of bias of each study and, if available, any outcome level assessment (see item 12).                                                                                                | NA                 |
| Results of individual studies | 20 | For all outcomes considered (benefits or harms), present, for each study: (a) simple summary data for each intervention group (b) effect estimates and confidence intervals, ideally with a forest plot. | 8, Tables 1, and   |

|                             |    |                                                                                                                                                                                      |                       |
|-----------------------------|----|--------------------------------------------------------------------------------------------------------------------------------------------------------------------------------------|-----------------------|
|                             |    |                                                                                                                                                                                      | Supplementary table 5 |
| Synthesis of results        | 21 | Present results of each meta-analysis done, including confidence intervals and measures of consistency.                                                                              | 8-9                   |
| Risk of bias across studies | 22 | Present results of any assessment of risk of bias across studies (see Item 15).                                                                                                      | 9                     |
| Additional analysis         | 23 | Give results of additional analyses, if done (e.g., sensitivity or subgroup analyses, meta-regression [see Item 16]).                                                                | 9-10                  |
| <b>DISCUSSION</b>           |    |                                                                                                                                                                                      |                       |
| Summary of evidence         | 24 | Summarize the main findings including the strength of evidence for each main outcome; consider their relevance to key groups (e.g., healthcare providers, users, and policy makers). | 10                    |
| Limitations                 | 25 | Discuss limitations at study and outcome level (e.g., risk of bias), and at review-level (e.g., incomplete retrieval of identified research, reporting bias).                        | 12                    |
| Conclusions                 | 26 | Provide a general interpretation of the results in the context of other evidence, and implications for future research.                                                              | 13                    |
| <b>FUNDING</b>              |    |                                                                                                                                                                                      |                       |
| Funding                     | 27 | Describe sources of funding for the systematic review and other support (e.g., supply of data); role of funders for the systematic review.                                           | Title page            |

*From:* Moher D, Liberati A, Tetzlaff J, Altman DG, The PRISMA Group (2009). Preferred Reporting Items for Systematic Reviews and Meta-Analyses: The PRISMA Statement. PLoS Med 6(6): e1000097. doi:10.1371/journal.pmed1000097
